# Supplementary material for: A conserved human CD4+ T cell subset recognizing the mycobacterial adjuvant trehalose monomycolate
Source: JCI journal article supplement (doi:10.1172/jci185443), 2024-12-24
Supplement: sd1 [file 1]

Supplemental Figure 1

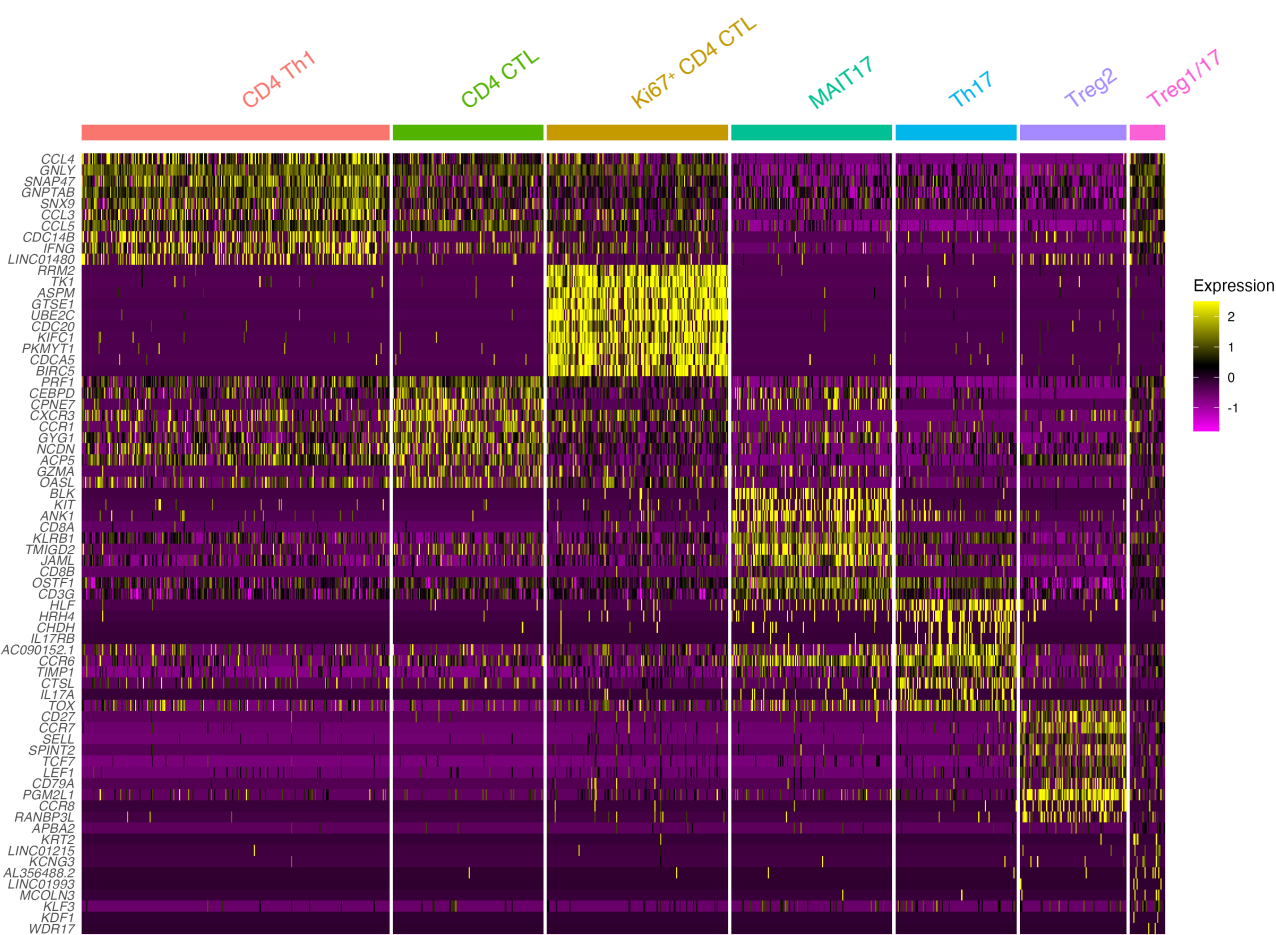

**Supplemental Figure 1. Characteristic genes in each cluster of UMAP plot in Figure 1D.**  
Log-normalized expression of the top 10 genes for each T cell cluster in Figure 1D are shown in heatmap. The colors of annotated clusters are consistent with the dots shown in Figure 1D.

## Supplemental Figure 2

A

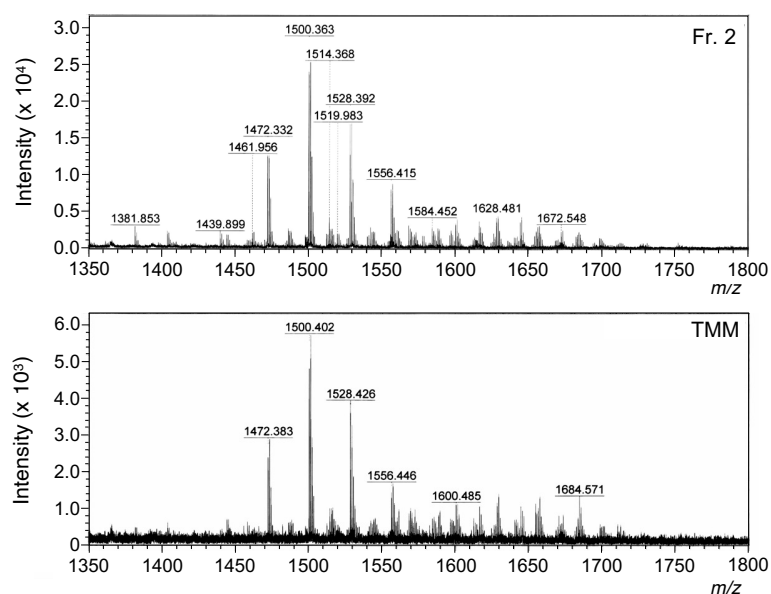

B

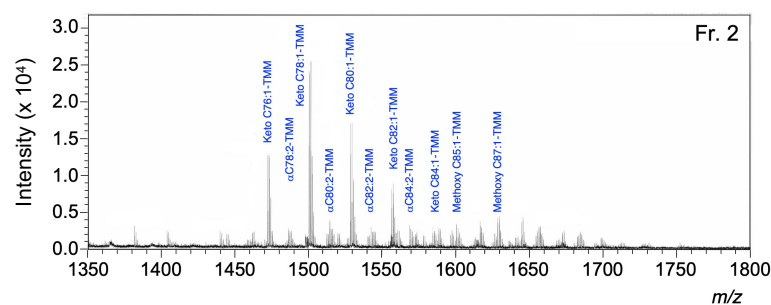

C

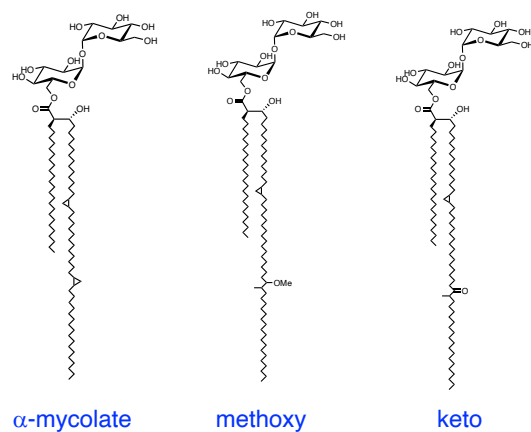

### Supplemental Figure 2. Identification of antigen recognized by Y-50.

A-B) MALDI-TOF MS spectrum of lipid fraction 2 (Fr2) and the reference spectrum of *M. tuberculosis* H37Rv TMM (lower) (A). The subclass of mycolate and chain length annotated based on the detected  $m/z$  matching the structural formula were indicated on upper panel of (A) (B). Related to Figure 2C.

C) Structural characteristics of TMM composed of three mycolic acid subclasses.

## Supplemental Figure 3

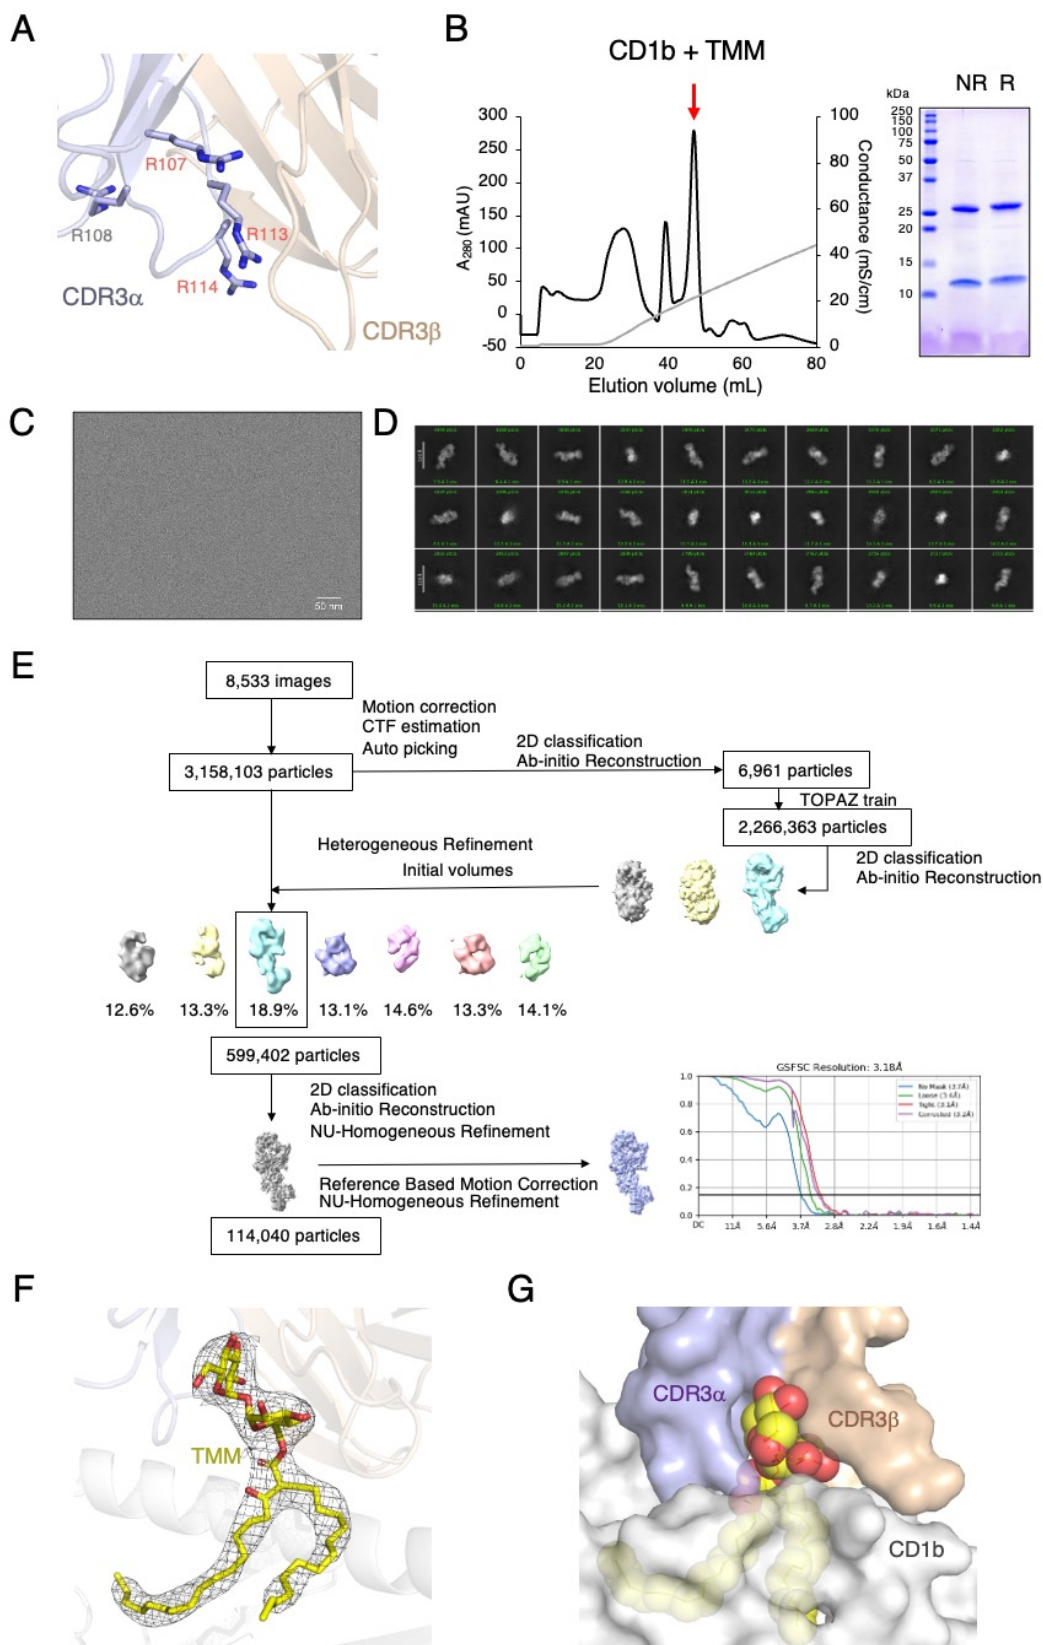

### Supplemental Figure 3. Structural analysis of Y-50 TCR-TMM-CD1b ternary complex.

A) Close-up view of the side chains of CDR3 $\alpha$  arginine residues (R107, R108, R113 and R114) in the crystal structure of Y-50 (PDB 8XUB).

B) Refolding of recombinant CD1b (CD1b) with synthetic TMM (TMM). Red arrow indicates refolded CD1b-TMM- $\beta$ 2m complex separated by anion-exchange chromatography (left), which was confirmed by SDS-PAGE followed by CBB staining (right). NR, non-reducing; R, reducing.

C-D) Representative micrograph (C) and 2D classification (D) of cryo-EM analysis.

E) Flow chart of cryo-EM image processing. Gold standard FSC curves are also shown.

F) Cryo-EM density map (gray mesh) and a model structure TMM (yellow).

G) TMM (yellow sphere) and surface representation of the CDR3 (violet), CDR3 $\beta$  (brown) loops and CD1b (gray) are shown. Oxygen atoms of TMM are shown in red.

# Supplemental Figure 4

A

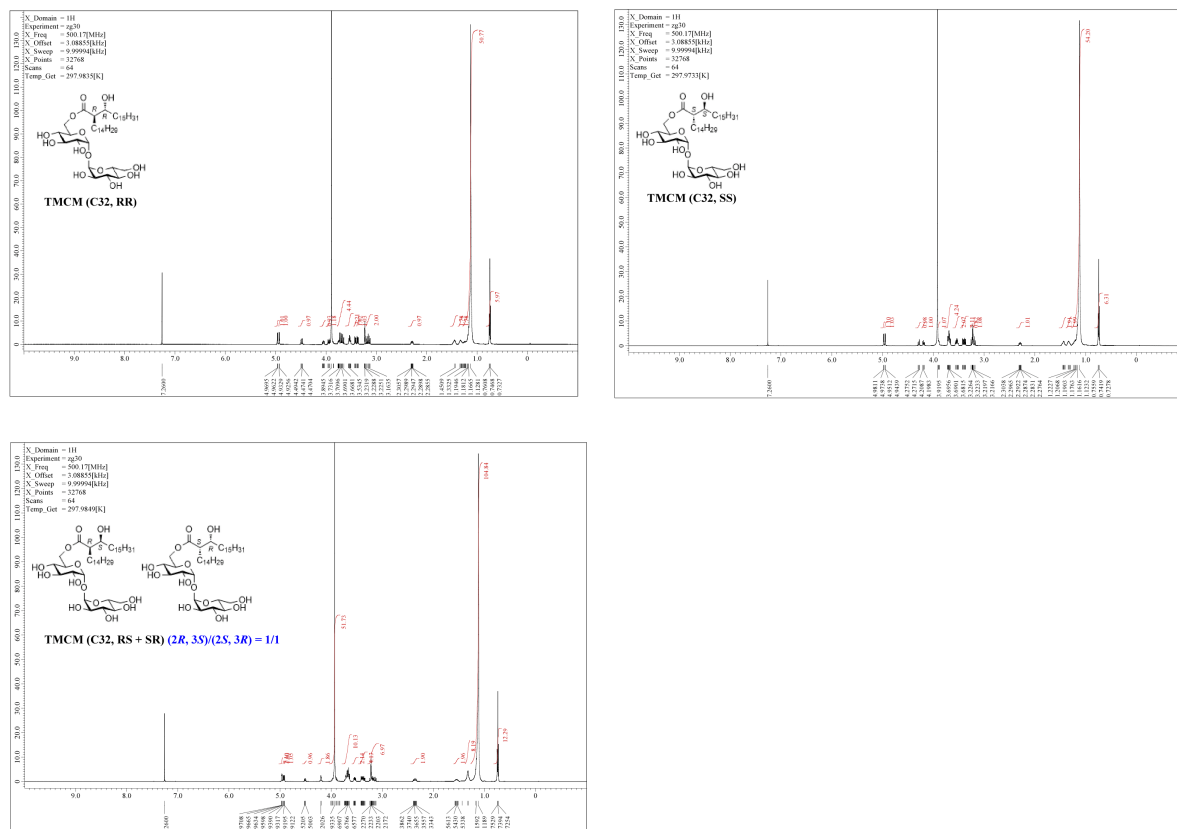

B

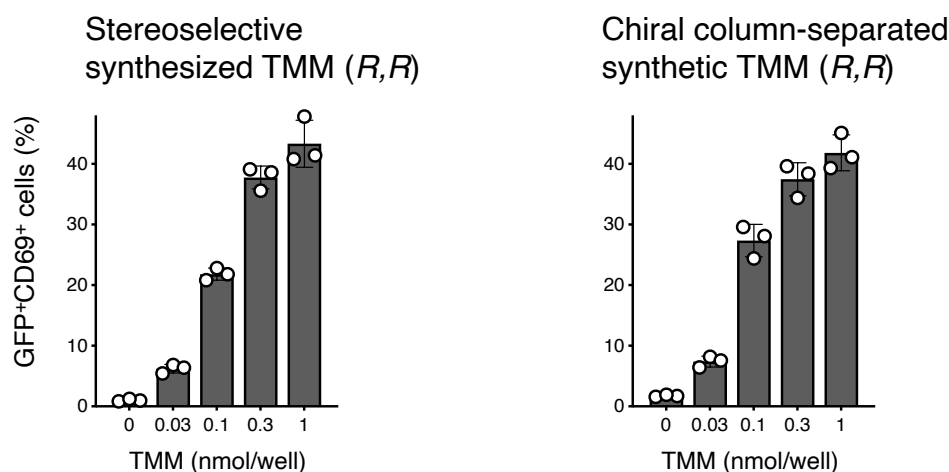

## Supplemental Figure 4. Synthesis of TMM.

A) NMR chart of synthetic TMMs (*(R,R)*, (*S,S*) and (*R,S* + *S,R*)).

B) Antigenic activity of synthetic TMM. Y-50 reporter cells were stimulated with stereoselective synthesized (left) or chiral column-separated synthetic (right) TMM (*R,R*) in the presence of CD1b-DC2.4 and analyzed for GFP and CD69 expression. Data are shown as the means  $\pm$  SD of triplicate assays and representative results from two independent experiments.

Supplemental Figure 5

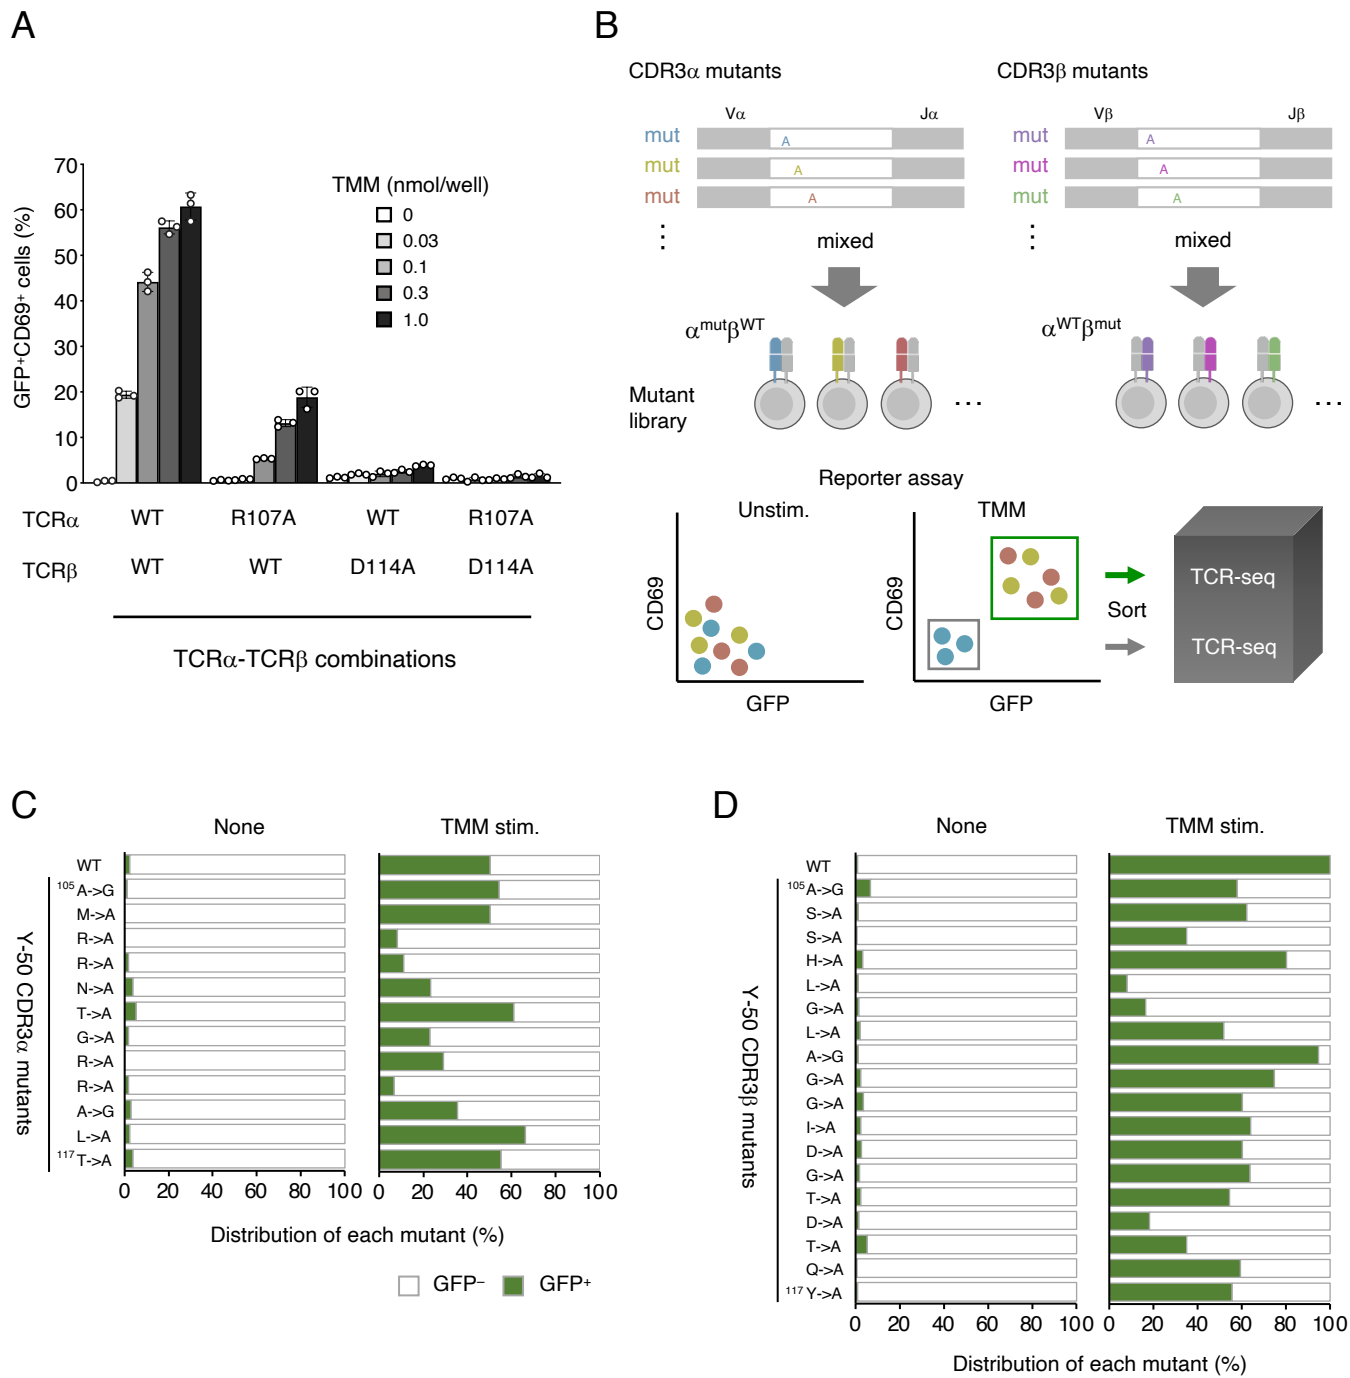

**Supplemental Figure 5. Mutagenesis analysis of Y-50 TCR.**

A) Reporter cells expressing indicated combination of Y-50 TCRαβ mutants were stimulated with TMM on CD1b-DC2.4 and percentages of GFP<sup>+</sup>CD69<sup>+</sup> cells are shown. Data are shown as the means ± SD of triplicates and a representative result from two independent experiments is shown.

B) Schematic procedure of NGS-based mutagenesis scanning.

C-D) Distribution of reporter cells expressing each mutant in GFP<sup>+</sup> and GFP<sup>-</sup> populations with or without TMM stimulation. The ratio of each CDR3α mutant (B) and CDR3β mutant (C) are shown as percentages. The number of amino acids were shown in accordance with the ImMunoGeneTics (IMGT) definition.

## Supplemental Figure 6

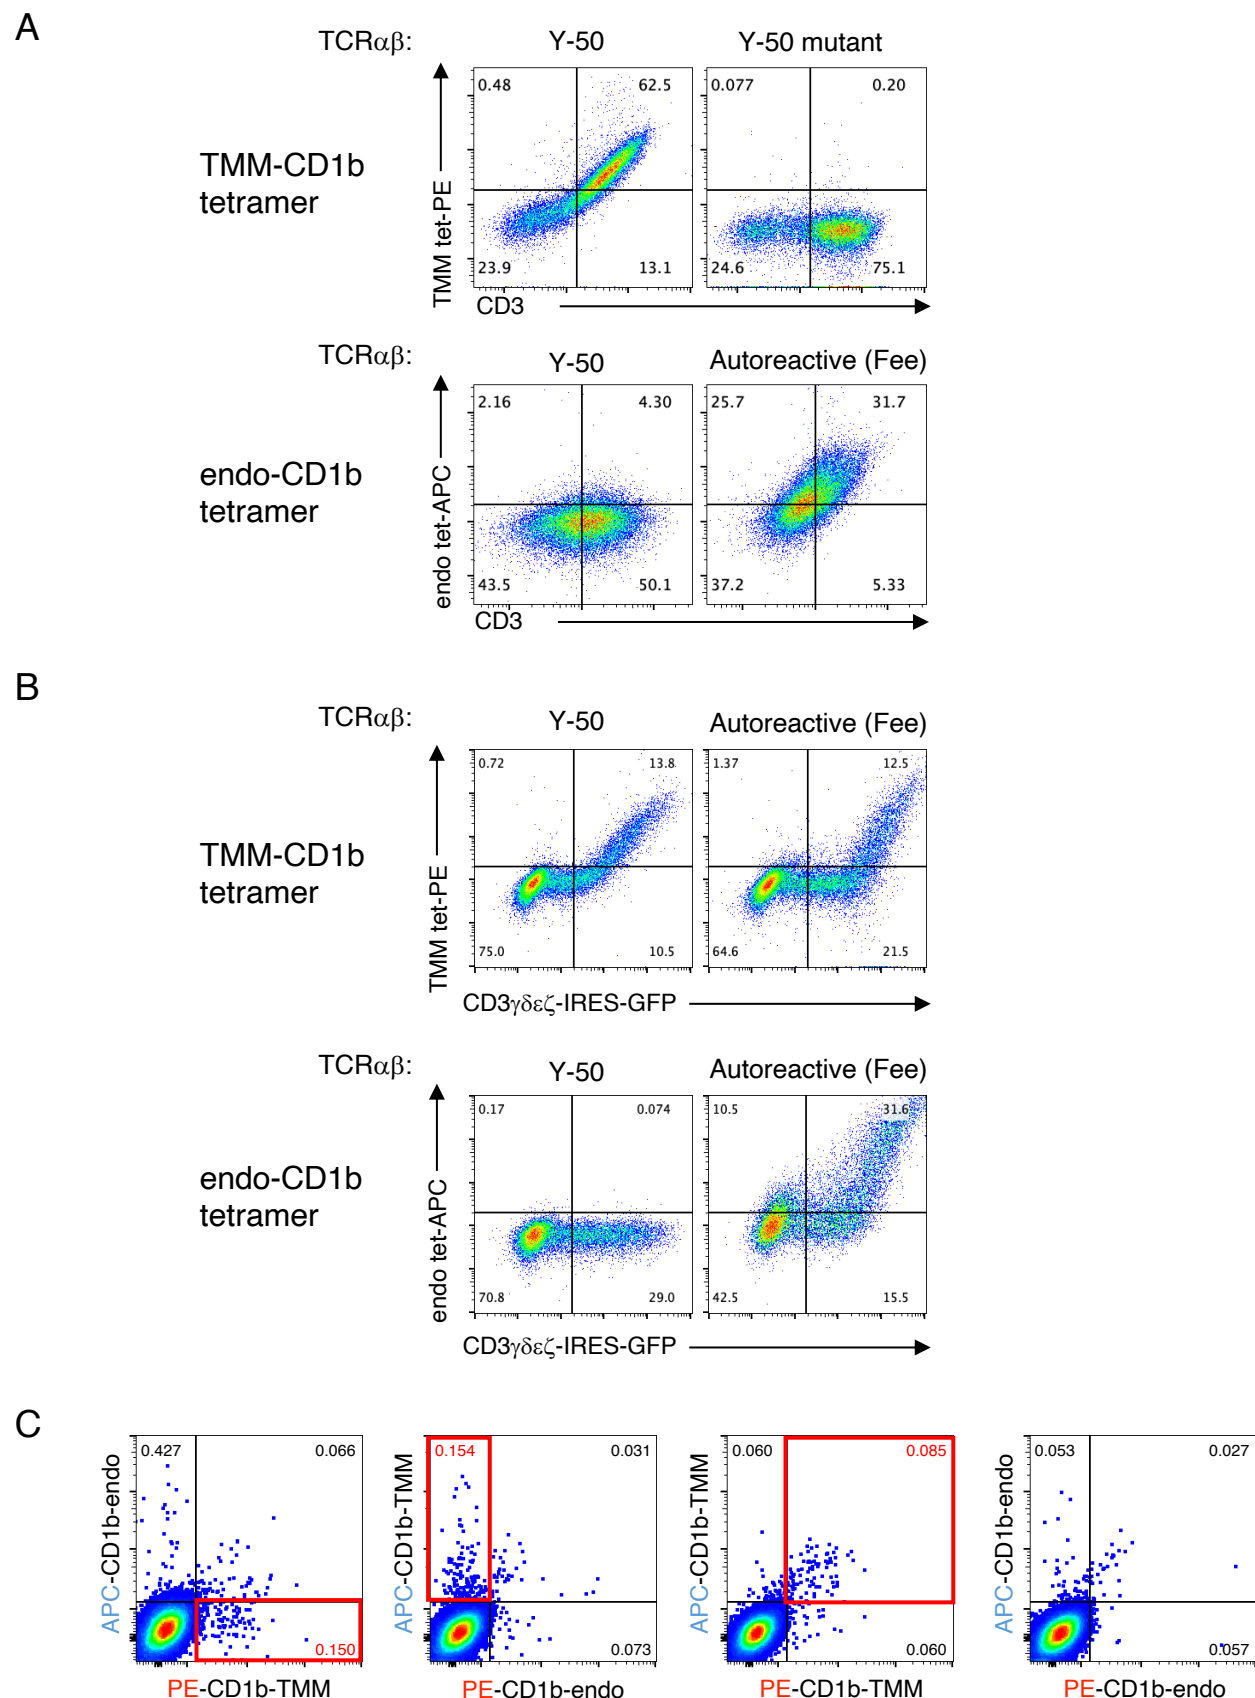

### Supplemental Figure 6. Validation of TMM-loaded CD1b tetramers.

A) Reporter cells expressing Y-50 and mutant Y-50 TCR shown in Figure 3B ( $\Delta 12$ ) were stained with PE-conjugated TMM-loaded CD1b tetramer and anti-CD3 antibody. As a control tetramer, CD1b biotinylated monomer conjugated by SA-APC (endo-CD1b tet) was prepared. Endo-CD1b tet reactivity was confirmed by Y-50 (negative control) and autoreactive Fee TCR (Gherardin et al., 2021) (positive control).

B) HEK 293T cells were transfected with plasmids encoding Fee TCR and human CD3s-IRES-GFP and stained with PE-conjugated TMM-CD1b or APC-conjugated endo-CD1b tetramers.

C) TMM-stimulated PBMCs were co-stained with all combination of four tetramers (APC-labeled CD1-TMM, PE-labeled CD1-endo tetramers, PE-labeled CD1-TMM and APC-labeled CD1-endo tetramers). Numbers in red indicate the frequency of TMM-specific T cells with CD3<sup>+</sup> cells for each staining combination.

Supplemental Figure 7

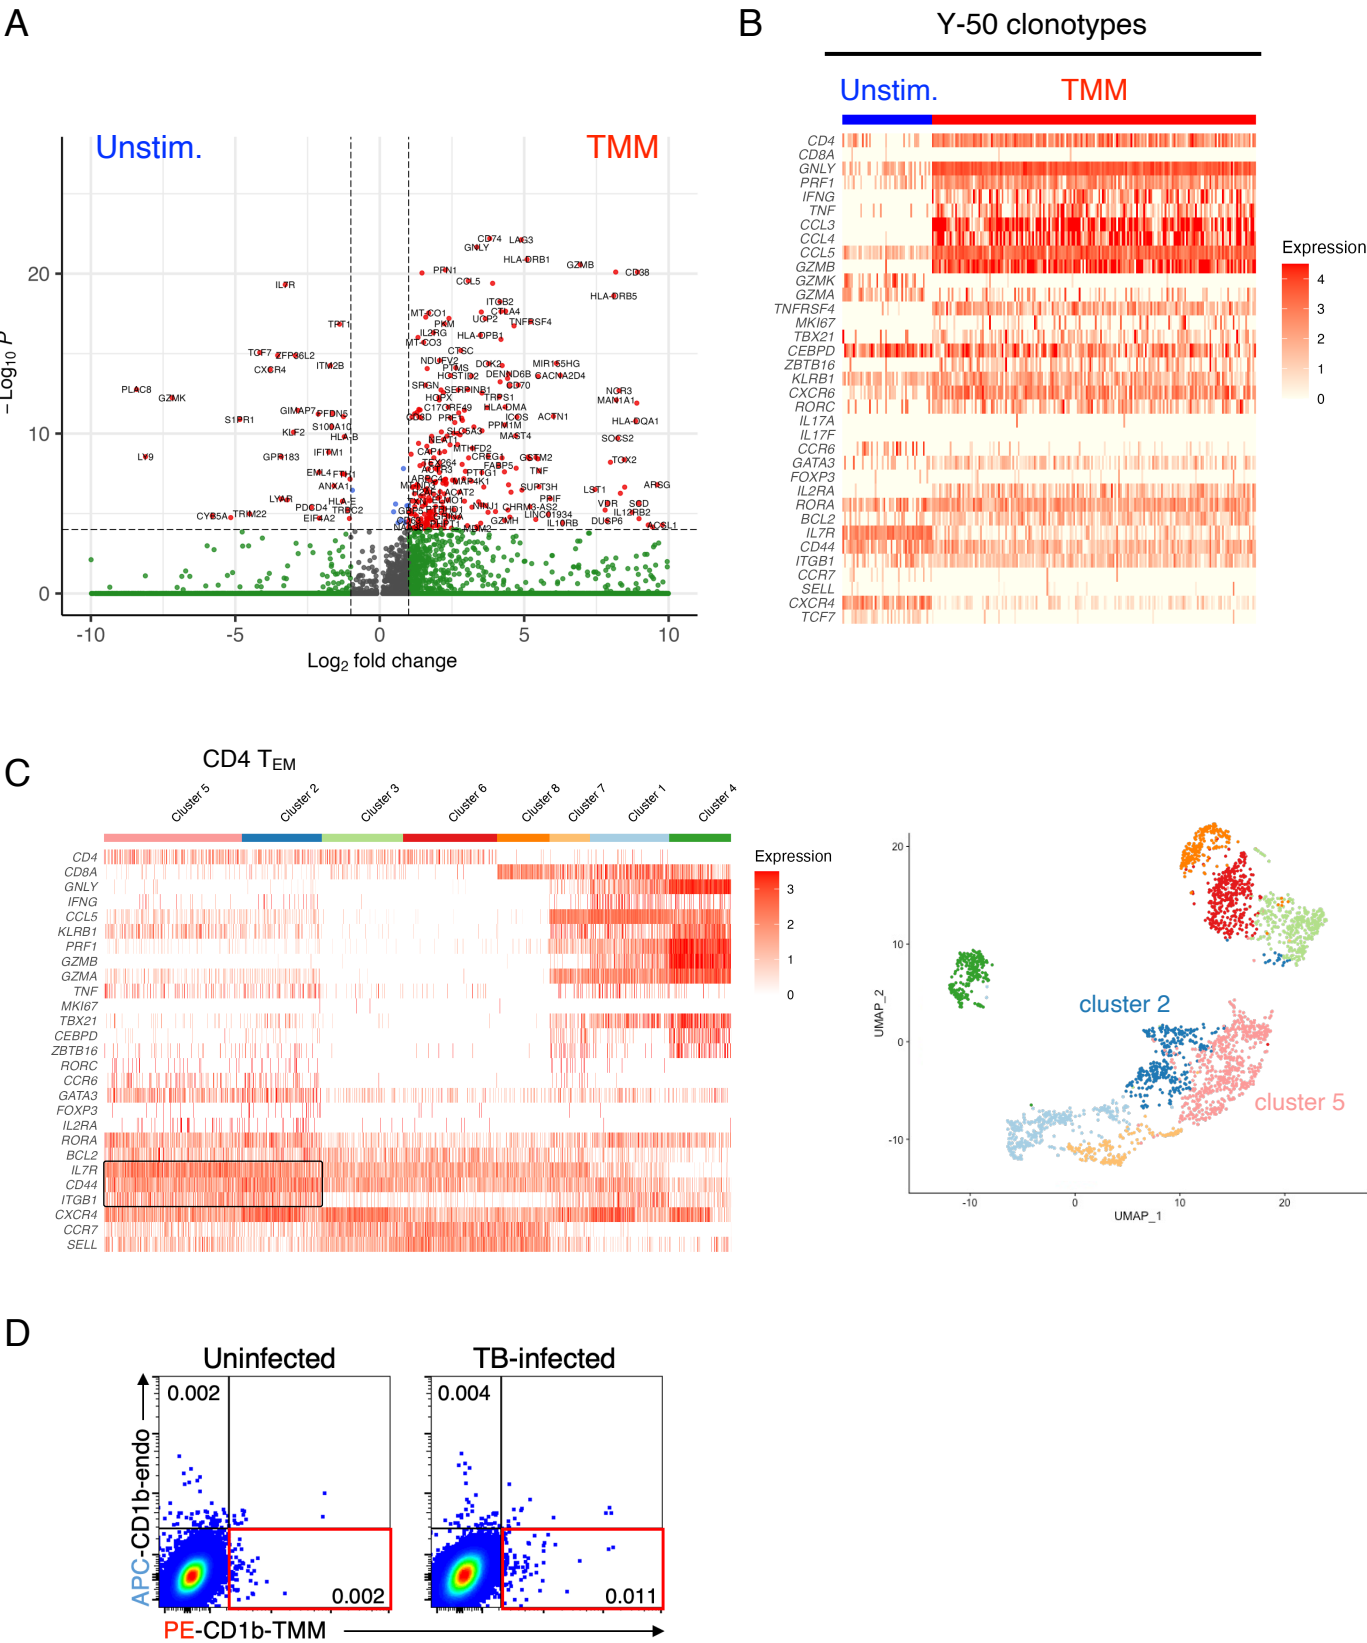

**Supplemental Figure 7. Gene expression profile of TMM-specific T cells with or without TMM stimulation.**

A) Volcano plot showing differentially expressed genes of Y-50 T cells in response to TMM stimulation.

B) Heatmap showing log-normalized expression of marker genes in individual Y-50 cells in the presence or absence of TMM stimulation.

C) Heatmap showing log-normalized expression of marker genes for each CD3<sup>+</sup> T clusters shown in Figure 7A-B. Typical signature of CD4<sup>+</sup> effector memory T cells is boxed.

D) Representative plots of the tetramer staining of PBMCs from uninfected (left) and TB-infected (right) donors. PBMCs were stained with PE-conjugated TMM-loaded CD1b tetramer, APC-conjugated CD1b-endo tetramer and anti-CD3 antibody. Numbers within boxes indicate the percentages of TMM-CD1b tetramer positive and endo-CD1b tetramer negative population in CD3<sup>+</sup> T cells are shown.



Supplemental Table 1. Mycobacterial lipid-reactive candidate T cells in human PBMCs.

| Ex# | clone ID | TRAV   | CDR3 $\alpha$    | TRAJ | TRBV | CDR3 $\beta$          | TRBJ |
|-----|----------|--------|------------------|------|------|-----------------------|------|
| U   | 2        | 1-2    | CAAMDSNYQLIW     | 33   | 6-4  | CASSDGGGTDQTQYF       | 2-3  |
|     | 14       | 8-3    | CAVGGGGYQKVTF    | 13   | 11-2 | CASSLVSSGALTEQYF      | 2-7  |
|     | 15       | 1-2    | CAVVDSNYQLIW     | 33   | 6-5  | CASSPGSGVAEQYF        | 2-7  |
|     | 53       | 20     | CAVRVYGQNFVF     | 26   | 20-1 | CSALQPGLAGPQITYEQYF   | 2-7  |
|     | 59       | 1-2    | CAVRDSNYQLIW     | 33   | 6-1  | CASSPSTGGSSPLHF       | 1-6  |
|     | 86       | 1-2    | CAVRDGDYKLSF     | 20   | 4-3  | CASSQDGSSGANVLTF      | 2-6  |
|     | 104      | 1-2    | CAVRDSNYQLIW     | 33   | 4-3  | CASSLATEPSYEQYF       | 2-7  |
|     | 221      | 1-2    | CAAMDSNYQLIW     | 33   | 20-1 | CSAKGPAGADTGELFF      | 2-2  |
| V   | 1        | 1-2    | CAVVDSNYQLIW     | 33   | 6-1  | CASSSSGSAADTQYF       | 2-3  |
|     | 2        | 27     | CAGGNSGNTPLVF    | 29   | 4-1  | CASRREGENIQYF         | 2-4  |
|     | 3        | 8-6    | CAVSDGRRDDKIIF   | 30   | 7-6  | CASSPLQRGTYEQYF       | 2-7  |
|     | 153      | 29/DV5 | CAASTYGGATNKLIIF | 32   | 30   | CAWSRRLQVLNGYTF       | 1-2  |
|     | 569      | 5      | CAEIPYTGGSNKLTFF | 10   | 4-1  | CASSQGGGATGNTIYF      | 1-3  |
|     | 570      | 8-4    | CAVSVGLGFGNVLHC  | 35   | 6-5  | CASSYSPGVWPQHFF       | 1-5  |
|     | 573      | 8-1    | CAVNAPHGEKLVF    | 8    | 5-1  | CASSPGTSGVYNEQFF      | 2-1  |
|     | 597      | 19     | CALSERSTGNQFYF   | 49   | 6-5  | CASSYSPGVWPQHFF       | 1-5  |
|     | 606      | 17     | CATVPNNDYKLSF    | 20   | 6-1  | CASYSTMNTEAFF         | 1-1  |
|     | 648      | 1-2    | CAVKDNYGQNFVF    | 26   | 30   | CAHRTRETQYF           | 2-5  |
|     | 828      | 41     | CAAFGNEKLTFF     | 48   | 30   | CAWSVSSGWPLHF         | 1-6  |
|     | 835      | 17     | CATDRAGANNLFF    | 36   | 4-1  | CASSQDPGNEKLTFF       | 1-4  |
|     | 1030     | 14/DV4 | CAMPAGTGRRALTF   | 5    | 11-3 | CASSLTSGGYGGTDQTQYF   | 2-3  |
|     | 1176     | 1-2    | CAVKDSNYQLIW     | 33   | 4-2  | CASSVERGAGANVLTF      | 2-6  |
| X   | 23       | 12-2   | CAANSNGGSNYKLTFF | 53   | 30   | CAWTRETGQPQHFF        | 1-5  |
|     | 34       | 23/DV6 | CAALHGSSNTGKLIF  | 37   | 11-2 | CASSDWTSSSGSYEQYF     | 2-7  |
|     | 84       | 8-4    | CAVRPAAGNKLTFF   | 17   | 28   | CASMADYNEQFF          | 2-1  |
|     | 291      | 3      | CAVRVLSGGYNKLIIF | 4    | 14   | CASSRRPYSGSTDTQYF     | 2-3  |
|     | 309      | 29/DV5 | CAASAKTSGSRLTF   | 58   | 7-2  | CASSLDPLGAKNIQYF      | 2-4  |
|     | 605      | 5      | CAESIWGSQGNLIIF  | 42   | 19   | CASSIDGRQLGSFF        | 1-1  |
|     | 700      | 1-2    | CAVSALYGQNFVF    | 26   | 11-2 | CASSDWTSSSGSYEQYF     | 2-7  |
| Y   | 0        | 8-2    | CVVRLYQKVTF      | 13   | 14   | CASSQGYRGSSYNEQFF     | 2-1  |
|     | 5        | 2      | CAVPSNTGKLIF     | 37   | 7-8  | CASSLAQGTGNNSPLHF     | 1-6  |
|     | 10       | 38-1   | CAFTPNTGNQFYF    | 49   | 4-1  | CASSQEFRTDEAFF        | 1-1  |
|     | 11       | 5      | CAESIGTGGFKTIF   | 9    | 30   | CAWSVLAGRGETQYF       | 2-5  |
|     | 13       | 12-2   | CAVNGGGFKTIF     | 9    | 7-3  | CASSLTPKRSNTGELFF     | 2-2  |
|     | 14       | 14/DV4 | CAMREGMGGNMLTF   | 39   | 20-1 | CSARHSASSYEQYF        | 2-7  |
|     | 16       | 12-3   | CAKGFNDYKLSF     | 20   | 7-8  | CASSLRGHLQETQYF       | 2-5  |
|     | 17       | 17     | CATLRNTNAGKSTF   | 27   | 20-1 | CSAVLTDQTQYF          | 2-3  |
|     | 18       | 14/DV4 | CAMRGSNNTGKLIF   | 37   | 7-9  | CASSLAGGQGLAYTF       | 1-2  |
|     | 22       | 8-3    | CAVGNSGGYQKVTF   | 13   | 7-2  | CASSPGAYEQYF          | 2-7  |
|     | 24       | 17     | CATKVTSGGSYIPTF  | 6    | 20-1 | CSALTSGRPDTQYF        | 2-3  |
|     | 28       | 9-2    | CALSETDSWGKLQF   | 24   | 20-1 | CSARGLAGGQYF          | 2-7  |
|     | 29       | 2      | CAVERDFNKFYF     | 21   | 20-1 | CSAPLAGGQFF           | 2-1  |
|     | 36       | 1-2    | CAVMSDSNYQLIW    | 33   | 6-1  | CASSDRGHSPPLHF        | 1-6  |
|     | 50       | 14/DV4 | CAMRRNTGRRALTF   | 5    | 4-1  | CASSHLGLAGGIDGTDQTQYF | 2-3  |
|     | 56       | 8-4    | CAVSPMIYNQGGKLIF | 23   | 14   | CASSQRGQVKGNITIYF     | 1-3  |
|     | 62       | 14/DV4 | CAILYNFNKFYF     | 21   | 12-4 | CASSLAQIAKNIQYF       | 2-4  |
|     | 66       | 20     | CAVQARTQGGSEKLVF | 57   | 12-3 | CASRDYLDSTDTQYF       | 2-3  |
|     | 83       | 22     | CAVVLWGGADGLTF   | 45   | 10-1 | CASSDGREQYF           | 2-7  |
|     | 87       | 12-2   | CAVSGSSNTGKLIF   | 37   | 4-2  | CASSQEPQQETQYF        | 2-5  |
|     | 92       | 1-2    | CAVRDRDYKLSF     | 20   | 6-2  | CASSYSDFNEQFF         | 2-1  |
|     | 114      | 17     | CATAGRIGARLMF    | 31   | 28   | CASRPTSGRAYGETQYF     | 2-5  |
|     | 151      | 8-6    | CAVSTFSSGSARQLTF | 22   | 11-2 | CASSLASGRPTDTQYF      | 2-3  |



**Supplemental Table 2.** Data collection and refinement statistics of the crystallographic analysis of Y-50.

|                                               |                                                       |
|-----------------------------------------------|-------------------------------------------------------|
| Crystal name                                  | Y-50                                                  |
| PDB ID                                        | 8XUB                                                  |
| Data collection statistics                    |                                                       |
| Space group                                   | <i>P</i> 2 <sub>1</sub> 2 <sub>1</sub> 2 <sub>1</sub> |
| Cell constants (Å)                            | <i>a</i> = 68.1 <i>b</i> = 168.7 <i>c</i> = 173.1     |
| Resolution (Å) <sup>a</sup>                   | 44.03 - 2.50 (2.59 - 2.50)                            |
| <i>R</i> -merge (%) <sup>a</sup>              | 2.62(42.8)                                            |
| Completeness (%) <sup>a</sup>                 | 99.9 (100.0)                                          |
| $\langle I/\sigma \rangle$ <sup>a</sup>       | 17.1 (1.6)                                            |
| Multiplicity <sup>a</sup>                     | 2.0 (2.0)                                             |
| Refinement statistics                         |                                                       |
| <i>R</i> (%)                                  | 22.6                                                  |
| <i>R</i> <sub>free</sub> (%)                  | 29.9                                                  |
| Root mean square deviations from ideal values |                                                       |
| Bond length (Å)                               | 0.009                                                 |
| Bond angle (°)                                | 1.07                                                  |
| Ramachandran plot                             |                                                       |
| Favored (%)                                   | 94.5                                                  |
| Outlier (%)                                   | 0                                                     |
| Rotamer outlier (%)                           | 2.84                                                  |

Statistics for the highest-resolution shell are shown in parentheses.

**Supplemental Table 3.** Cryo-EM data collection, refinement and validation statistics.

|                                       |                  |
|---------------------------------------|------------------|
| <b>PDB ID</b>                         | <b>8ZOX</b>      |
| <b>EMDB ID</b>                        | <b>EMD-60321</b> |
| <b>Data collection and processing</b> |                  |
| Magnification                         | 103,703          |
| Voltage (kV)                          | 300              |
| Electron exposure (e-/Å²)             | 60               |
| Defocus range (µm)                    | -0.6 to -1.8     |
| Pixel size (Å)                        | 0.675            |
| Symmetry imposed                      | C1               |
| Initial particle image                | 4,075,153        |
| Final particle image                  | 114,111          |
| Map resolution (Å)                    | 3.18             |
| FSC threshold                         | 0.143            |
| Map sharpening <i>B</i> factor (Å²)   | 118.4            |
| <b>Refinement</b>                     |                  |
| Model composition                     |                  |
| Non-hydrogen atoms                    | 6,590            |
| Protein residues                      | 813              |
| Ligands                               | 5                |
| <i>B</i> factor (Å²)                  |                  |
| Protein                               | 125.4            |
| Ligand                                | 114.0            |
| Root-mean-square deviations           |                  |
| Bond lengths (Å)                      | 0.005            |
| Bond angles (° )                      | 0.604            |
| Validation                            |                  |
| MolProbity score                      | 1.91             |
| Clashscore                            | 11.9             |
| Poor rotamers (%)                     | 0.71             |
| Ramachandran plot                     |                  |
| Favored (%)                           | 95.4             |
| Allowed (%)                           | 4.5              |
| Disallowed (%)                        | 0.1              |

**Supplemental Table 4. Donor information.**

| Donor ID | Age (years) | Gender | Definition |
|----------|-------------|--------|------------|
| F507     | 26          | M      | Active     |
| F508     | 49          | M      | Active     |
| F509     | 83          | F      | Active     |
| F510     | 55          | M      | Active     |
| F511     | 64          | M      | Active     |
| F514     | 79          | M      | Active     |
| F515     | 39          | M      | Active     |
| F516     | 60          | M      | Active     |
| F517     | 90          | F      | Active     |
| F518     | 34          | F      | Active     |
| F519     | 19          | M      | Active     |
| F520     | 78          | M      | Active     |
| F521     | 63          | M      | Active     |
| MI001    | 27          | M      | Uninfected |
| MI002    | 25          | M      | Uninfected |
| MI003    | 24          | F      | Uninfected |
| MI004    | 27          | M      | Uninfected |
| MI011    | 60          | F      | Uninfected |
| MI012    | 27          | F      | Uninfected |
| MI013    | 36          | F      | Uninfected |
| NA001    | 49          | M      | Uninfected |
| NA002    | 31          | M      | Uninfected |
| NA003    | 44          | M      | Uninfected |
| NA004    | 22          | F      | Uninfected |
| NA005    | 33          | F      | Uninfected |
| NA006    | 28          | M      | Uninfected |
| NA007    | 27          | M      | Uninfected |
| NA008    | 22          | F      | Uninfected |
| NA009    | 40          | F      | Uninfected |
| NA010    | 56          | F      | Uninfected |

Active: 56.8 + 22.6 y.o., male = 77%  
Uninfected (JPN): 32.3 + 12.8 y.o., male = 23%  
Uninfected (US): 35.2 + 11.6 y.o., male = 38%

## **Supplemental information**

### **Extended Methods**

### **Chemical synthesis**

### **Experiments and Reagents**

Reactions were carried out under a nitrogen atmosphere unless noted otherwise. Reactions were monitored by thin-layer chromatography using Merck Silica Gel 60 F254 plates. Flash chromatography was performed using flash silica gel 60N (spherical neutral, particle size 40–50  $\mu\text{m}$ ) purchased from Kanto Chemical Co. Ltd.

### **Instrumentation**

NMR spectra were recorded Bruker Avance III (500 MHz) with a Prodigy (nitrogen-based) cryoprobe or JNM-ECZL600R (600 MHz) with ROYAL HFX probe. Chemical shifts were reported in the scale relative to  $\text{CHCl}_3$  ( $\delta$  7.26 ppm for  $^1\text{H}$  NMR, 77.16 ppm for  $^{13}\text{C}$  NMR) or pyridine ( $\delta$  7.58 ppm for  $^1\text{H}$  NMR, 135.91 ppm for  $^{13}\text{C}$  NMR) as an internal reference. Splitting patterns are designated as s: singlet, d: doublet, t: triplet, q: quartet, br: broadening, and m: multiplet. High-resolution mass spectrometry (HRMS) was obtained with Bruker MicroTOF II or Bruker MALDI-TOF MS Autoflex speed. Gel permeation chromatography (GPC) was executed with LaboACE LC-5060 equipped with JAIGEL-1HR and JAIGEL-2HR ( $\text{CHCl}_3$ ). HPLC purification was performed on the HITACHI HPLC system consisting of the following: pump, L6250; detector, L-3350 RI monitor; column, Senshu-Pak PEGASIL silica SP100; mobile phase, hexane/EtOAc.

## Synthesis of trehalose monomycolate analogue

**TME ( $\Delta$ OH):** lacking an  $\alpha$ -branched alkyl chain

**TME ( $\Delta$ branch,  $\Delta$ OH):** lacking an  $\alpha$ -branched alkyl chain and a  $\beta$ -hydroxy group

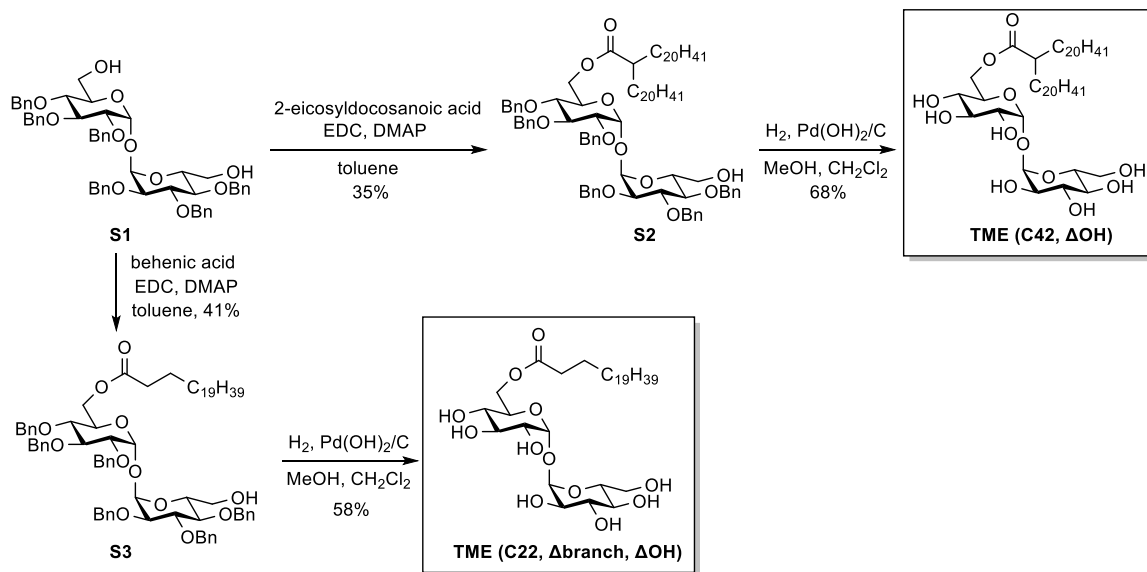

## Compound S2

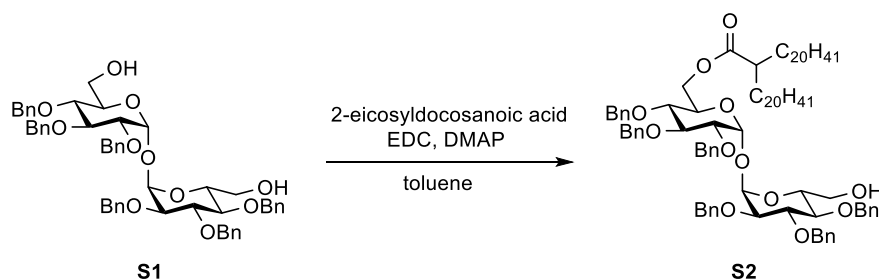

To a solution of compound **S1** (*1, 2*) (92.0 mg, 104  $\mu$ mol), 2-eicosyldocosanoic acid (*3*) (90.6 mg, 146  $\mu$ mol, 1.4 equiv.), and DMAP (17.8 mg, 146  $\mu$ mol, 1.4 equiv.) in toluene (1 mL) was added EDC $\cdot$ HCl (28.0 mg, 146  $\mu$ mol, 1.4 equiv.). After stirring at 60  $^{\circ}$ C for 4 h, the reaction mixture was treated with EtOAc (1 mL) and water (3 mL). After

separating layers, the aqueous layer was extracted with EtOAc (2 mL). The combined organic layer was washed with water (5 mL) and brine (5 mL), dried over Na<sub>2</sub>SO<sub>4</sub> and concentrated under reduced pressure. The residue was purified by silica gel column chromatography (Yamazen, ULTRAPACK Silica-40B, eluent: MeOH/CHCl<sub>3</sub> = 0/1 to 1/99) to give **S2** as a colorless oil (54.3 mg, 35%): [ $\alpha$ ]<sub>D</sub><sup>27</sup> +75.04 (c = 0.54, CHCl<sub>3</sub>); <sup>1</sup>H NMR (500 MHz, CDCl<sub>3</sub>)  $\delta$  7.38–7.25 (m, 30H), 5.18 (d, *J* = 3.7 Hz, 1H), 5.16 (d, *J* = 3.7 Hz, 1H), 5.01 (d, *J* = 11.0 Hz, 1H), 5.00 (d, *J* = 11.0 Hz, 1H), 4.90–4.86 (m, 4H), 4.73 (d, *J* = 11.9 Hz, 1H), 4.72 (d, *J* = 11.9 Hz, 1H), 4.685 (d, *J* = 11.9 Hz, 1H), 4.681 (d, *J* = 11.9 Hz, 1H), 4.65 (d, *J* = 11.0 Hz, 1H), 4.55 (d, *J* = 10.4 Hz, 1H), 4.23 (ddd, *J* = 9.5, 3.4, 2.1 Hz, 1H), 4.20 (dd, *J* = 12.2, 2.1 Hz, 1H), 4.13 (dd, *J* = 12.2, 3.4 Hz, 1H), 4.07 (dd, *J* = 9.5, 9.5 Hz, 1H), 4.06 (dd, *J* = 9.2, 9.2 Hz, 1H), 4.07–4.03 (m, 1H), 3.60–3.53 (m, 6H), 2.33 (m, 1H), 1.60–1.39 (m, 4H), 1.33–1.16 (m, 72H), 0.89 (t, *J* = 6.7 Hz, 6H); <sup>13</sup>C NMR (126 MHz, CDCl<sub>3</sub>)  $\delta$  176.4, 138.9, 138.8, 138.3, 138.1 (2C), 138.0, 128.7–127.5 (30C), 94.0, 93.9, 81.7 (2C), 79.8, 79.7, 78.0, 77.5, 75.9, 75.7, 75.4, 75.2, 73.2, 73.1, 71.4, 69.4, 62.2, 61.7, 45.9, 32.48, 32.46, 32.1 (2C), 29.9–29.8 (26C), 29.71, 29.69, 29.5 (2C), 27.62, 27.57, 22.8 (2C), 14.3 (2C); HRMS-ESI (*m/z*) [M+Na]<sup>+</sup> calcd for C<sub>96</sub>H<sub>140</sub>NaO<sub>12</sub>, 1509.0276; found 1509.0282.

**TME (C42, ΔOH)**

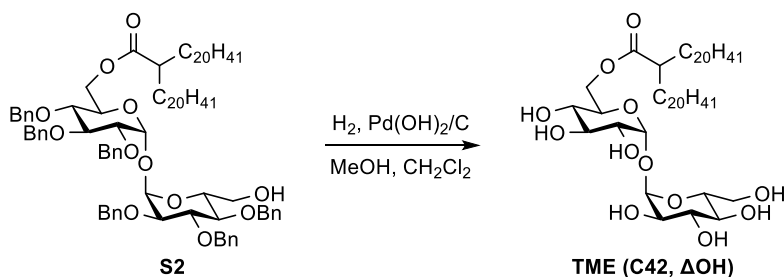

To a solution of **S2** (18.2 mg, 12.2  $\mu\text{mol}$ ) in  $\text{CH}_2\text{Cl}_2/\text{MeOH}$  (1/1, 3 mL) was added  $\text{Pd(OH)}_2/\text{C}$  (5 wt%, 18.2 mg, 6.5  $\mu\text{mol}$ , 53 mol%) under nitrogen atmosphere. The flask was equipped with a hydrogen balloon via a three-way cock and purged with hydrogen. After stirring at room temperature for 18 h, the mixture was filtered through a pad of Celite<sup>®</sup> and rinsed with  $\text{CH}_2\text{Cl}_2/\text{MeOH}$  (1/1). The filtrate was concentrated under reduced pressure. The residue was purified by silica gel column chromatography (eluent:  $\text{MeOH}/\text{CHCl}_3 = 1/8$  to  $1/5$ ) to give **TME (C42,  $\Delta\text{OH}$ )** as a white solid (7.9 mg, 68%):  $[\alpha]_{\text{D}}^{28} +90.91$  ( $c = 0.20$ ,  $\text{CHCl}_3/\text{MeOH}$  9/1);  $^1\text{H NMR}$  (500 MHz,  $\text{CDCl}_3/\text{CD}_3\text{OD}$  9/1)  $\delta$  5.05 (d,  $J = 4.3$  Hz, 1H), 5.04 (d,  $J = 4.3$  Hz, 1H), 4.32–4.26 (m, 1H), 4.23 (dd,  $J = 12.1$ , 4.0 Hz, 1H), 3.91 (m, 1H), 3.83 (dd,  $J = 9.5$ , 9.2 Hz, 1H), 3.82 (dd,  $J = 9.5$ , 9.2 Hz, 1H), 3.80–3.73 (m, 2H), 3.63 (dd,  $J = 12.7$ , 5.5 Hz, 1H), 3.50–3.44 (m, 2H), 3.33–3.26 (m, 2H), 2.29 (m, 1H), 1.56–1.45 (m, 2H), 1.44–1.34 (m, 2H), 1.33–1.16 (m, 72H), 0.81 (t,  $J = 7.0$  Hz, 6H);  $^{13}\text{C NMR}$  (126 MHz,  $\text{CDCl}_3/\text{CD}_3\text{OD}$  9/1)  $\delta$  177.3, 93.7, 93.6, 73.2, 72.8, 72.3, 71.72, 71.65, 70.8, 70.3, 70.2, 62.7, 62.1, 45.7, 32.1, 31.9 (2C), 29.9–29.7 (25C), 29.6 (2C), 29.5 (2C), 29.4 (2C), 27.4, 27.3, 22.7 (2C), 14.1 (2C); **HRMS-MALDI** ( $m/z$ )  $[\text{M}+\text{Na}]^+$  calcd for  $\text{C}_{54}\text{H}_{104}\text{NaO}_{12}$ , 967.7425; found 967.74.

### Compound S3



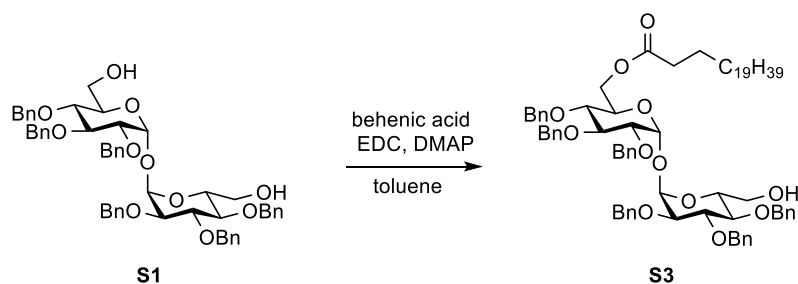

To a solution of compound **S1** (*1*, *2*) (235 mg, 266  $\mu\text{mol}$ ), behenic acid (127 mg, 373  $\mu\text{mol}$ , 1.4 equiv.), and DMAP (45.5 mg, 373  $\mu\text{mol}$ , 1.4 equiv.) in toluene (2.6 mL) was added EDC $\cdot$ HCl (71.4 mg, 373  $\mu\text{mol}$ , 1.4 equiv.). After stirring at 60  $^{\circ}\text{C}$  for 7 h, the reaction mixture was treated with EtOAc (2 mL) and water (3 mL). After separating the layers, the aqueous layer was extracted with EtOAc (2 mL). The combined organic layer was washed with water (5 mL) and brine (5 mL), dried over  $\text{Na}_2\text{SO}_4$ , and concentrated under reduced pressure. The residue was purified by silica gel column chromatography (Yamazen, ULTRAPACK Silica-40B, eluent: hexane/EtOAc = 4/1 to 3/7) to give **S3** as a colorless oil (132 mg, 41%):  $[\alpha]_{\text{D}}^{24} +72.29$  ( $c = 1.0$ ,  $\text{CHCl}_3$ );  $^1\text{H}$  NMR (500 MHz,  $\text{CDCl}_3$ )  $\delta$  7.39–7.26 (m, 30H), 5.17 (d,  $J = 3.4$  Hz, 2H), 5.03 (d,  $J = 11.0$  Hz, 1H), 5.01 (d,  $J = 11.0$  Hz, 1H), 4.90 (d,  $J = 11.0$  Hz, 1H), 4.891 (d,  $J = 11.0$  Hz, 1H), 4.888 (d,  $J = 11.0$  Hz, 1H), 4.88 (d,  $J = 10.7$  Hz, 1H), 4.74 (d,  $J = 11.9$  Hz, 1H), 4.72 (d,  $J = 11.9$  Hz, 1H), 4.69 (d,  $J = 11.9$  Hz, 2H), 4.66 (d,  $J = 11.0$  Hz, 1H), 4.54 (d,  $J = 10.7$  Hz, 1H), 4.25 (ddd,  $J = 10.1, 3.4, 2.1$  Hz, 1H), 4.15 (dd,  $J = 12.1, 3.4$  Hz, 1H), 4.11–4.04 (m, 2H), 4.08 (dd,  $J = 9.5, 9.5$  Hz, 1H), 4.07 (dd,  $J = 9.5, 9.5$  Hz, 1H), 3.61–3.52 (m, 6H), 2.26 (t,  $J = 7.3$  Hz, 2H), 1.62–1.54 (m, 2H), 1.50 (t,  $J = 6.7$  Hz, 1H), 1.34–1.22 (m, 36H), 0.90 (t,  $J = 7.0$  Hz, 3H);  $^{13}\text{C}$  NMR (126 MHz,  $\text{CDCl}_3$ )  $\delta$  173.6, 138.9, 138.7, 138.3, 138.09, 138.05, 138.0, 128.7–127.6 (30C), 94.2, 94.0, 81.8, 81.7, 79.5 (2C), 77.7, 77.5, 75.8, 75.7, 75.3,

75.2, 73.2, 73.1, 71.4, 69.3, 62.6, 61.7, 34.3, 32.1, 29.9–29.8 (11C), 29.76, 29.6, 29.5, 29.4, 29.3, 25.0, 22.8, 14.3; **HRMS-MALDI** ( $m/z$ )  $[M+Na]^+$  calcd for  $C_{76}H_{100}NaO_{12}$ , 1227.7112; found 1227.71.

**TME (C22,  $\Delta$ branch,  $\Delta$ OH)**

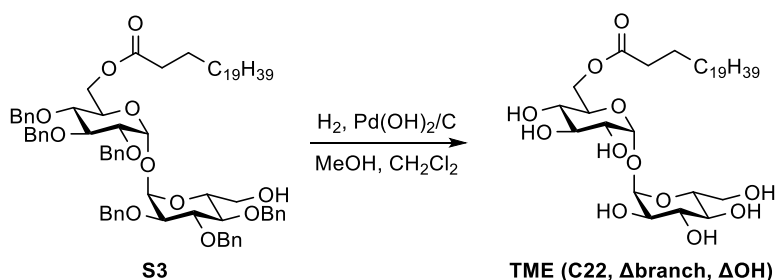

To a solution of **S3** (60.0 mg, 49.8  $\mu\text{mol}$ ) in  $\text{CH}_2\text{Cl}_2/\text{MeOH}$  (1/1, 3 mL) was added  $\text{Pd(OH)}_2/\text{C}$  (5 wt%, 60.0 mg, 21.4  $\mu\text{mol}$ , 43 mol%) under nitrogen atmosphere. The flask was equipped with a hydrogen balloon via a three-way cock and purged with hydrogen. After stirring at room temperature for 18 h, the mixture was filtered through a pad of Celite<sup>®</sup> and rinsed with MeOH. The filtrate was concentrated under reduced pressure. The residue was washed with ice-cold  $\text{CHCl}_3$  (0.5 mL) to give **TME (C22,  $\Delta$ branch,  $\Delta$ OH)** as a white solid (19.2 mg, 58%):  $[\alpha]_D^{23} +112.43$  ( $c = 0.20$ ,  $\text{CHCl}_3/\text{MeOH}$  4/1);  $^1\text{H}$  NMR (600 MHz, pyridine- $d_5$ )  $\delta$  7.40 (broad singlet, 1H), 7.27–6.80 (broad multiplet, 5H), 6.32 (broad singlet, 1H), 5.954 (d,  $J = 3.6$  Hz, 1H), 5.949 (d,  $J = 3.6$  Hz, 1H), 5.12 (ddd,  $J = 9.5, 5.2, 1.9$  Hz, 1H), 5.03 (dd,  $J = 11.8, 1.9$  Hz, 1H), 4.99 (ddd,  $J = 9.5, 4.6, 2.6$  Hz, 1H), 4.86 (dd,  $J = 11.8, 5.2$  Hz, 1H), 4.82 (dd,  $J = 9.3, 9.3$  Hz, 1H), 4.80 (dd,  $J = 9.3, 9.3$  Hz, 1H), 4.49 (dd,  $J = 11.8, 2.6$  Hz, 1H), 4.44 (dd,  $J = 11.8, 4.6$  Hz, 1H), 4.35 (dd,  $J = 9.5, 9.3$  Hz, 1H), 4.32 (dd,  $J = 9.3, 3.6$  Hz, 1H), 4.32 (dd,  $J = 9.3, 3.6$  Hz, 1H),

4.20 (dd,  $J = 9.5, 9.3$  Hz, 1H), 2.38–2.29 (m, 2H), 1.62 (tt,  $J = 7.4, 7.4$  Hz, 2H), 1.34–1.13 (m, 36H), 0.87 (t,  $J = 6.9$  Hz, 3H);  $^{13}\text{C}$  NMR (151 MHz, pyridine- $d_5$ )  $\delta$  174.1, 96.1, 96.0, 75.3, 75.2, 74.9, 73.9, 73.8, 72.7, 72.4, 71.9, 64.8, 63.1, 34.8, 32.5, 30.44–30.35 (10C), 30.32, 30.31, 30.2, 30.00, 29.98, 29.8, 25.7, 23.3, 14.7; **HRMS-MALDI** ( $m/z$ )  $[\text{M}+\text{Na}]^+$  calcd for  $\text{C}_{34}\text{H}_{64}\text{NaO}_{12}$ , 687.4295; found 687.43.

## Synthesis of TMMs

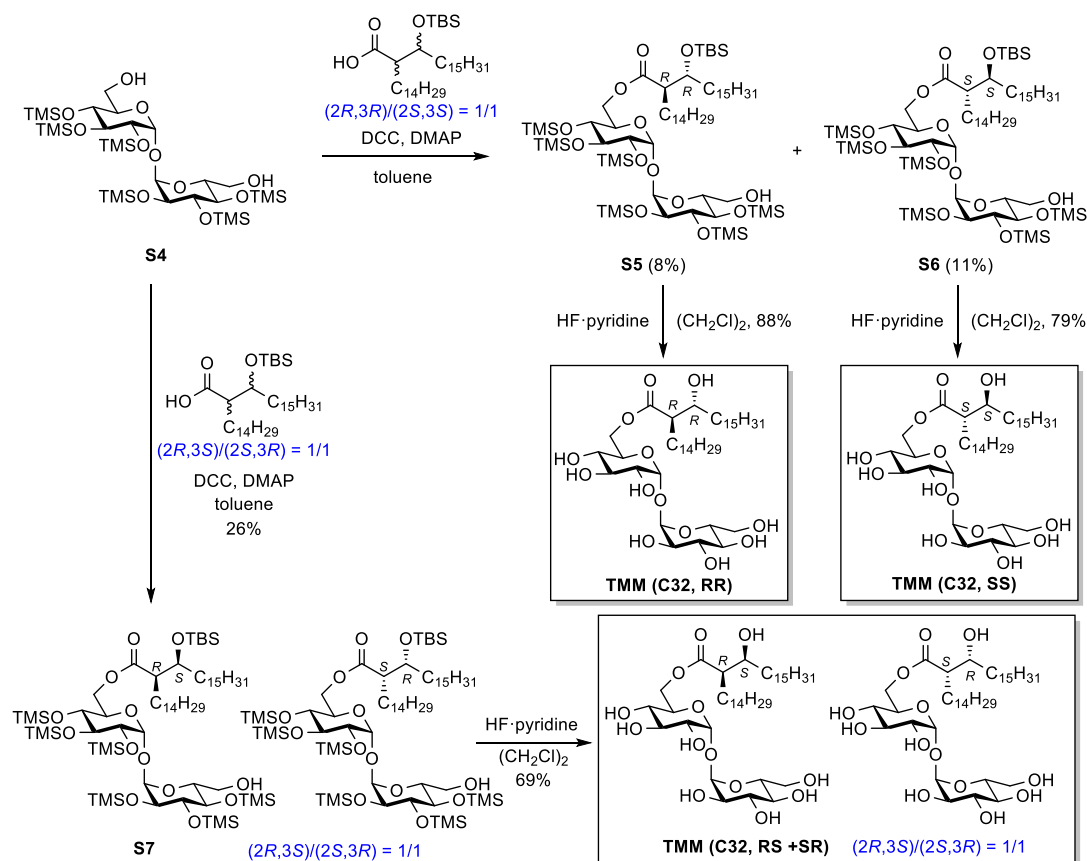

## Compound S5 and S6

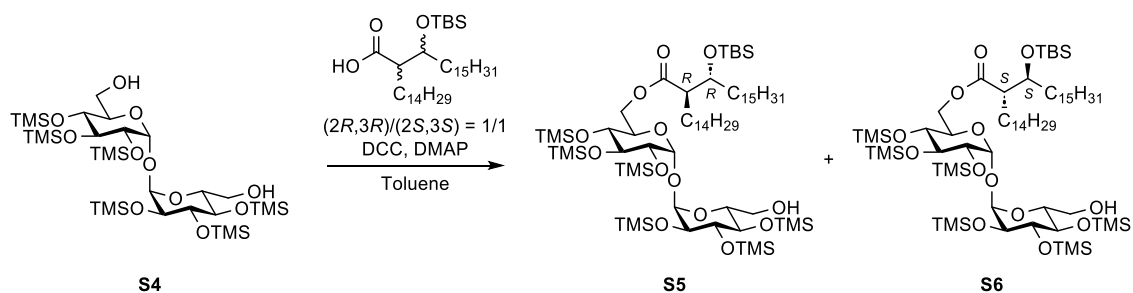

To a mixture of compound **S4** (**4**, **5**) (235 mg, 303  $\mu$ mol), (2*R*,3*R*)-3-*tert*-butyldimethylsilyloxy-2-tetradecyloctadecanoic acid<sup>5</sup> (185 mg, 303  $\mu$ mol, 1.0 equiv., diastereomer ratio:1/1), DCC (62.5 mg, 303  $\mu$ mol, 1.0 equiv.), and DMAP (3.7 mg, 30  $\mu$ mol, 0.1 equiv.) was added ice-cold toluene (1 mL). The reaction mixture was warmed up to room temperature over 9 h. After stirring at 70 °C for 8 h, the mixture was filtered through a pad of Celite<sup>®</sup> and rinsed with toluene. The filtrate was concentrated under reduced pressure. The residue was purified by silica gel column chromatography (eluent: hexane/Et<sub>2</sub>O = 19/1 to 17/3) and GPC to give the mixture of **S5** and **S6**. The mixture was separated by silica gel column chromatography (Iatrobeads 6RS-8060<sup>®</sup>, eluent: hexane/Et<sub>2</sub>O = 19/1 to 17/3) to give (2*R*,3*R*)-**S5** as a colorless oil (33.9 mg, 8%, less polar) and (2*S*,3*S*)-**S6** as a colorless oil (46.6 mg, 11%, more polar)

Compound **S5**:  $[\alpha]_D^{24} +61.86$  ( $c = 0.44$ , CHCl<sub>3</sub>); <sup>1</sup>H NMR (500 MHz, CDCl<sub>3</sub>)  $\delta$  4.91 (d,  $J = 3.4$  Hz, 1H), 4.84 (d,  $J = 3.1$  Hz, 1H), 4.34 (dd,  $J = 11.9, 2.1$  Hz, 1H), 4.07 (dd,  $J = 11.9, 4.0$  Hz, 1H), 3.98 (ddd,  $J = 9.0, 4.0, 2.1$  Hz, 1H), 3.94 (m, 1H), 3.90 (dd,  $J = 9.3, 9.2$  Hz, 1H), 3.89 (dd,  $J = 9.5, 9.2$  Hz, 1H), 3.84 (ddd,  $J = 9.2, 3.7, 2.8$  Hz, 1H), 3.70 (dd,  $J = 11.9, 2.8$  Hz, 1H), 3.67 (dd,  $J = 11.9, 3.7$  Hz, 1H), 3.48 (dd,  $J = 9.2, 9.0$  Hz, 1H), 3.47 (dd,  $J = 9.2, 9.2$  Hz, 1H), 3.42 (dd,  $J = 9.3, 3.4$  Hz, 1H), 3.38 (dd,  $J = 9.5, 3.1$  Hz, 1H), 2.55 (ddd,  $J = 10.6, 5.5, 3.4$  Hz, 1H), 1.65–1.55 (m, 2H), 1.50–1.18 (m, 52H), 0.88 (t,  $J$

= 6.7 Hz, 6H), 0.87 (s, 9H), 0.16 (s, 9H), 0.150 (s, 9H), 0.145 (s, 9H), 0.141 (s, 9H), 0.139 (s, 9H), 0.11 (s, 9H), 0.051 (s, 3H), 0.047 (s, 3H); <sup>13</sup>C NMR (126 MHz, CDCl<sub>3</sub>) δ 174.2, 94.7, 94.5, 73.6, 73.5 (2C), 73.03, 72.96, 72.9, 72.1, 71.6, 70.9, 62.6, 61.8, 52.0, 33.6, 32.1 (2C), 30.0, 29.94, 29.9–29.73 (14C), 29.7, 29.5, 28.3 (2C), 26.5, 26.0 (3C), 25.0, 22.9 (2C), 18.2, 14.3 (2C), 1.22 (3C), 1.17 (3C), 1.1 (3C), 1.0 (3C), 0.3 (3C), 0.2 (3C), –4.3, –4.5; HRMS-MALDI (*m/z*) [M+Na]<sup>+</sup> calcd for C<sub>68</sub>H<sub>146</sub>NaO<sub>13</sub>Si<sub>7</sub>, 1389.9046; found 1389.90.

Compound **S6**: [ $\alpha$ ]<sub>D</sub><sup>23</sup> +62.92 (c = 0.59, CHCl<sub>3</sub>); <sup>1</sup>H NMR (500 MHz, CDCl<sub>3</sub>) δ 4.92 (d, *J* = 3.4 Hz, 1H), 4.85 (d, *J* = 3.1 Hz, 1H), 4.51 (m, 1H), 4.00–3.92 (m, 3H), 3.91 (dd, *J* = 9.2, 8.9 Hz, 1H), 3.89 (dd, *J* = 9.3, 8.9 Hz, 1H), 3.82 (ddd, *J* = 9.2, 4.0, 2.8 Hz, 1H), 3.70 (dd, *J* = 11.8, 2.8 Hz, 1H), 3.66 (dd, *J* = 11.8, 4.0 Hz, 1H), 3.47 (dd, *J* = 9.2, 8.9 Hz, 2H), 3.42 (dd, *J* = 9.3, 3.4 Hz, 1H), 3.36 (dd, *J* = 9.2, 3.1 Hz, 1H), 2.54 (ddd, *J* = 10.4, 6.0, 3.7 Hz, 1H), 1.62–1.53 (m, 1H), 1.52–1.38 (m, 3H), 1.37–1.16 (m, 50H), 0.88 (t, *J* = 6.7 Hz, 6H), 0.86 (s, 9H), 0.16 (s, 9H), 0.155 (s, 9H), 0.151 (s, 9H), 0.145 (s, 9H), 0.139 (s, 9H), 0.11 (s, 9H), 0.05 (s, 3H), 0.03 (s, 3H); <sup>13</sup>C NMR (126 MHz, CDCl<sub>3</sub>) δ 174.3, 94.5, 94.4, 73.7, 73.5, 73.2, 73.03, 72.99, 72.9, 72.2, 71.6, 71.1, 62.5, 61.8, 52.1, 33.5, 32.1 (2C), 30.0, 29.9–29.8 (15C), 29.7, 29.5 (2C), 28.2, 26.9, 26.0 (3C), 24.7, 22.9 (2C), 18.2, 14.3 (2C), 1.3 (3C), 1.2 (6C), 1.0 (3C), 0.4 (3C), 0.2 (3C), –4.4, –4.6; HRMS-MALDI (*m/z*) [M+Na]<sup>+</sup> calcd for C<sub>68</sub>H<sub>146</sub>NaO<sub>13</sub>Si<sub>7</sub>, 1389.9046; found 1389.90.

## Compound S7

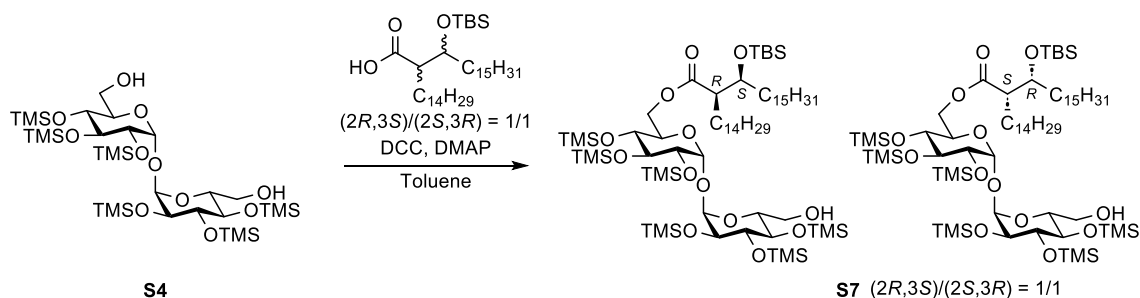

To a mixture of compound **S4** (4, 5) (127 mg, 164  $\mu\text{mol}$ ), (2*RS*,3*SR*)-3-*tert*-butyldimethylsilyloxy-2-tetradecyloctadecanoic acid<sup>5</sup> (100 mg, 164  $\mu\text{mol}$ , 1.0 equiv., diastereomer ratio:1/1), DCC (33.8 mg, 164  $\mu\text{mol}$ , 1.0 equiv.), and DMAP (2.0 mg, 16  $\mu\text{mol}$ , 0.1 equiv.) was added ice-cold toluene (1 mL). The reaction mixture was warmed up to room temperature over 3 h. After stirring at 70°C for 8 h, the mixture was filtered through a pad of Celite® and rinsed with toluene. The filtrate was concentrated under reduced pressure. The residue was purified by silica gel column chromatography (eluent: hexane/Et<sub>2</sub>O = 19/1 to 17/3) and GPC (eluent: CHCl<sub>3</sub>) to give (2*R*,3*S*)/(2*S*, 3*R*)-**S7** as a colorless oil (59.1 mg, 26%, diastereomer ratio:1/1):  $[\alpha]_{\text{D}}^{24} +51.20$  ( $c = 0.20$ , CHCl<sub>3</sub>); <sup>1</sup>H NMR (500 MHz, CDCl<sub>3</sub>)  $\delta$  4.92 (d,  $J = 3.1$  Hz, 1H), 4.89 (d,  $J = 3.1$  Hz, 1H), 4.84 (d,  $J = 3.1$  Hz, 1H), 4.83 (d,  $J = 3.1$  Hz, 1H), 4.61 (dd,  $J = 11.9, 2.1$  Hz, 1H), 4.46 (dd,  $J = 11.9, 2.4$  Hz, 1H), 4.03 (dd,  $J = 11.9, 3.4$  Hz, 1H), 3.99–3.94 (m, 2H), 3.93–3.81 (m, 9H), 3.70 (dd,  $J = 11.6, 2.8$  Hz, 2H), 3.66 (dd,  $J = 11.6, 3.1$  Hz, 2H), 3.53–3.44 (m, 4H), 3.42 (dd,  $J = 9.5, 3.1$  Hz, 1H), 3.41 (dd,  $J = 9.5, 3.1$  Hz, 1H), 3.38 (dd,  $J = 9.3, 3.1$  Hz, 1H), 3.35 (dd,  $J = 9.5, 3.1$  Hz, 1H), 2.53–2.46 (m, 2H), 1.74–1.43 (m, 8H), 1.39–1.15 (m, 100H), 0.89 (s, 9H), 0.882 (s, 9H), 0.879 (t,  $J = 7.0$  Hz, 12H), 0.16 (s, 27H), 0.15 (s, 18H), 0.143 (s, 27H), 0.138 (s, 9H), 0.136 (s, 9H), 0.109 (s, 9H), 0.06 (s, 3H), 0.05 (s, 3H), 0.044 (s, 3H), 0.038 (s, 3H); <sup>13</sup>C NMR (126 MHz, CDCl<sub>3</sub>)  $\delta$  174.64, 174.62, 94.7, 94.65

(2C), 94.56, 73.8, 73.6, 73.5 (2C), 73.4, 73.3, 73.04, 73.02, 72.97 (2C), 72.89, 72.86, 72.2, 72.0, 71.6, 71.5, 71.2, 71.0, 62.18, 62.15, 61.82, 61.79, 51.9, 51.7, 35.5, 35.3, 32.1 (4C), 30.2, 30.1, 30.0, 29.9–29.74 (30C), 29.7, 29.6, 29.5 (4C), 28.8, 28.0, 27.7, 26.1 (6C), 24.4, 24.2, 22.9 (4C), 18.29, 18.27, 14.3 (4C), 1.23 (6C), 1.17 (6C), 1.1 (6C), 1.0 (6C), 0.4 (3C), 0.34 (3C), 0.26 (3C), 0.2 (3C), –4.0, –4.1, –4.3, –4.4; **HRMS-MALDI** ( $m/z$ ):  $[M+Na]^+$  calcd for  $C_{68}H_{146}NaO_{13}Si_7$ , 1389.9046; found 1389.90.

### TMM (C32, *RR*)

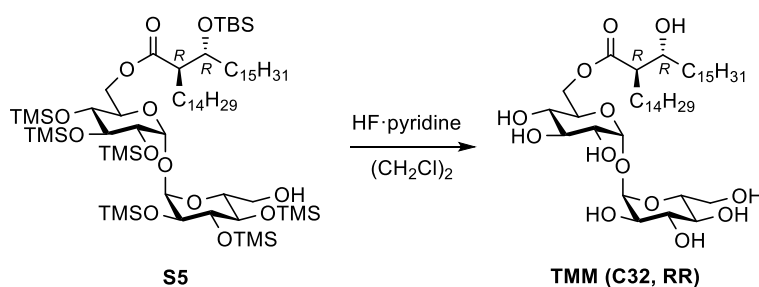

To a solution of compound **S5** (11.0 mg, 8.04  $\mu$ mol) in  $(CH_2Cl)_2$  (0.3 mL) was added 70% HF·pyridine (43  $\mu$ L) at room temperature. After stirring at room temperature for 11 h, the resulting mixture was poured into a saturated aqueous  $NaHCO_3/CHCl_3$  solution (1/1, 1 mL). The water layer was extracted with  $CHCl_3$  (2 x 1 mL). The combined organic layer was dried over  $Na_2SO_4$  and concentrated under reduced pressure. The residue was purified by silica gel column chromatography (Iatrobeads 6RS-8060<sup>®</sup>, eluent:  $CHCl_3/MeOH = 9/1$  to  $5/1$ ) to give **TMM (C32, *RR*)** as a white solid (5.8 mg, 88%).

### TMM (C32, *SS*)



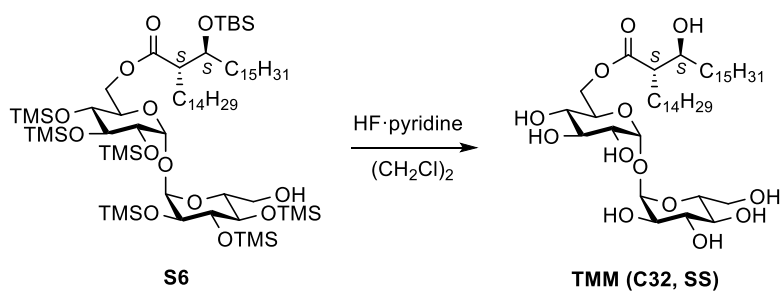

To a solution of compound **S6** (12.4 mg, 9.06  $\mu\text{mol}$ ) in  $(\text{CH}_2\text{Cl})_2$  (0.3 mL) was added 70%  $\text{HF}\cdot\text{pyridine}$  (49  $\mu\text{L}$ ) at room temperature. After stirring at room temperature for 11 h, the resulting mixture was poured into a saturated aqueous  $\text{NaHCO}_3/\text{CHCl}_3$  solution (1/1, 1 mL). The water layer was extracted with  $\text{CHCl}_3$  (2 x 1 mL). The combined organic layer was dried over  $\text{Na}_2\text{SO}_4$  and concentrated under reduced pressure. The residue was purified by silica gel column chromatography (Iatrobeads 6RS-8060<sup>®</sup>, eluent:  $\text{CHCl}_3/\text{MeOH} = 9/1$  to 5/1) to give **TMM (C32, SS)** as a white solid (5.9 mg, 79%).

### **TMM (C32, RS +SR)**

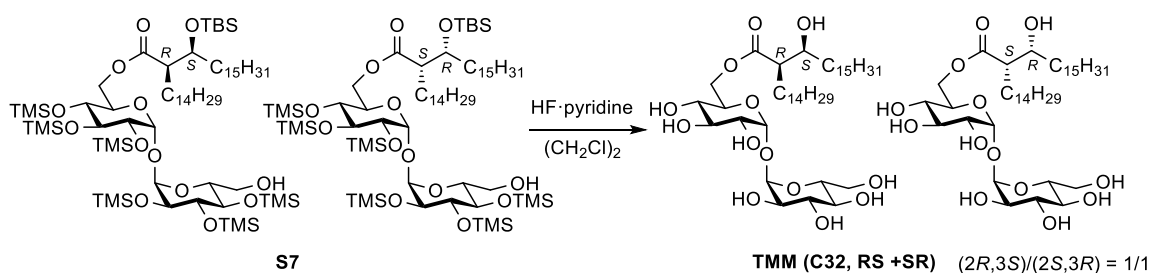

To a solution of compound **S7** (23.8 mg, 17.4  $\mu\text{mol}$ ) in  $(\text{CH}_2\text{Cl})_2$  (0.3 mL) was added 70%  $\text{HF}\cdot\text{pyridine}$  (94  $\mu\text{L}$ ) at room temperature. After stirring at room temperature for 11 h, the resulting mixture was poured into a saturated aqueous  $\text{NaHCO}_3/\text{CHCl}_3$  solution (1/1, 1 mL). The water layer was extracted with  $\text{CHCl}_3$  (2 x 1 mL). The combined organic layer was dried over  $\text{Na}_2\text{SO}_4$  and concentrated under reduced pressure. The residue was

purified by silica gel column chromatography (Iatrobeads 6RS-8060<sup>®</sup>, eluent: CHCl<sub>3</sub>/MeOH = 9/1 to 5/1) to give **TMM (C32, *RS*+*SR*)** as a white solid (9.8 mg, 69%).

## Large scale chemical synthesis of TMM

### Synthesis of the trehalose precursor S11

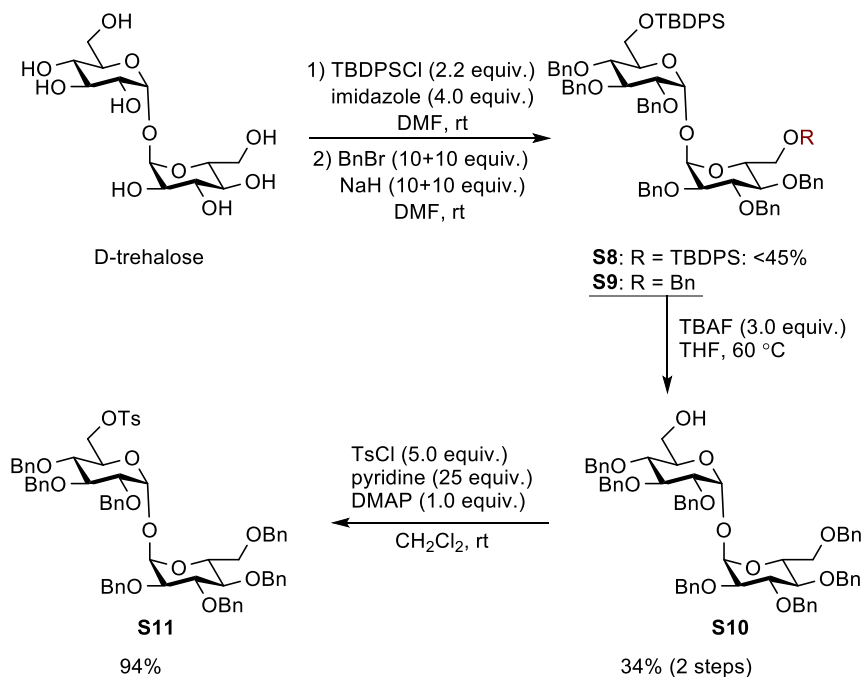

### Compound S11

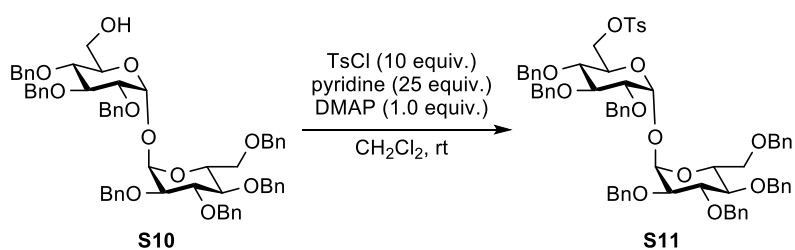

To a solution of **S10** (**6**) (85.6 mg, 88.0  $\mu\text{mol}$ ), DMAP (10.7 mg, 88.0  $\mu\text{mol}$ , 1.0 equiv.) and pyridine (178  $\mu\text{L}$ , 2.20 mmol, 25 equiv.) in dichloromethane (880  $\mu\text{L}$ ) was added TsCl (168 mg, 880  $\mu\text{mol}$ , 10 equiv.). After stirring for 18 h at room temperature, the resulting solution was treated with aqueous saturated  $\text{NaHCO}_3$  (2 mL) and extracted with EtOAc (20 mL). After separating layers, the organic layer was washed with brine (5 mL),

dried over Na<sub>2</sub>SO<sub>4</sub>, and concentrated under reduced pressure. The residue was purified by silica gel column chromatography (Biotage Sfär Silica HC Duo 10 g, hexane/EtOAc = 92/8 to 71/29) to give **S11** (83.5 mg, 74.1 μmol, 84%) as a colorless oil.

Compound **S11**: [ $\alpha$ ]<sub>D</sub><sup>18</sup> +64.93 (*c* 2.65, CHCl<sub>3</sub>); <sup>1</sup>H NMR (500 MHz, CDCl<sub>3</sub>): δ 7.68 (d, *J* = 8.2 Hz, 2H), 7.35–7.18 (m, 33H), 7.13–7.08 (m, 4H), 5.11–5.08 (m, 2H), 4.97 (d, *J* = 10.7 Hz, 1H), 4.95 (d, *J* = 11.0 Hz, 1H), 4.85 (d, *J* = 11.0 Hz, 1H), 4.82–4.76 (m, 3H), 4.69 (d, *J* = 11.9 Hz, 1H), 4.66–4.60 (m, 2H), 4.57 (d, *J* = 11.9 Hz, 1H), 4.53 (d, *J* = 12.2 Hz, 1H), 4.45 (d, *J* = 10.7 Hz, 1H), 4.39–4.35 (m, 2H), 4.15–4.08 (m, 2H), 4.00–3.92 (m, 3H), 3.80 (dd, *J* = 10.7, 1.8 Hz, 1H), 3.65 (dd, *J* = 9.5, 8.9 Hz, 1H), 3.55 (dd, *J* = 9.8, 3.7 Hz, 1H), 3.53–3.45 (m, 3H), 3.36 (dd, *J* = 10.7, 1.8 Hz, 1H), 2.37 (s, 3H); <sup>13</sup>C NMR (126 MHz, CDCl<sub>3</sub>): δ 144.9, 138.9, 138.8, 138.4, 138.2, 138.1, 138.0, 137.9, 132.9, 129.9 (2C), 128.50–128.48 (16C), 128.1 (7C), 128.0 (2C), 127.9 (2C), 127.8 (2C), 127.68–127.66 (4C), 127.5 (2C), 127.4 (2C), 94.7, 94.3, 81.9, 81.6, 79.5, 79.3, 77.8, 77.0, 75.70, 75.67, 75.24, 75.17, 73.6, 73.1, 72.8, 70.9, 68.9, 68.3, 68.2, 21.8; **HRMS-ESI** (*m/z*): [M+Na]<sup>+</sup> calcd for C<sub>68</sub>H<sub>70</sub>NaO<sub>13</sub>S, 1149.4435; found 1149.4412

## Compound S12

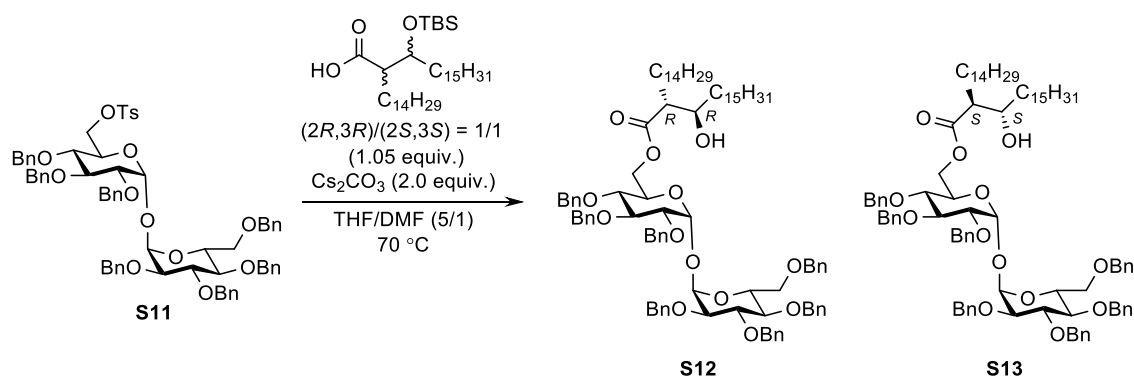

To a solution of **S11** (41.7 mg, 36.5  $\mu\text{mol}$ ) and (2*RS*,3*RS*)-3-tert-butyldimethylsilyloxy-2-tetradecyloctadecanoic acid(**5**) (19.1 mg, 38.4  $\mu\text{mol}$ , 1.05 equiv.) in THF/DMF (360  $\mu\text{L}$ , 5:1) was added  $\text{Cs}_2\text{CO}_3$  (23.8 mg, 73.1  $\mu\text{mol}$ , 2.0 equiv.) at room temperature. After stirring for 48 h at 70  $^\circ\text{C}$ , the resulting solution was poured into a mixture of  $\text{Et}_2\text{O}$  (5 mL) and water (5 mL). After separating layers, the organic layer was washed with brine (3 mL), dried over  $\text{Na}_2\text{SO}_4$ , and concentrated under reduced pressure. The residue was purified by MPLC (YAMAZEN, Ultrapack, silica-40B, hexane/ $\text{EtOAc}$  97/3 to 85/15). Further separation was carried out by HPLC (Senshu Pack PEGASIL silica SP100  $\phi$  20, hexane/ $\text{EtOAc}$  = 85/15) to give **S12** (12.6 mg, 8.90  $\mu\text{mol}$ , 24%) as a colorless oil and **S13** (15.4 mg, 10.6  $\mu\text{mol}$ , 29%) as a colorless oil.

Compound **S12**:  $[\alpha]_{\text{D}}^{18} +76.24$  ( $c$  0.11,  $\text{CHCl}_3$ );  $^1\text{H NMR}$  (500 MHz,  $\text{CDCl}_3$ ):  $\delta$  7.36–7.20 (m, 33H), 7.14–7.11 (m, 2H), 5.21 (d,  $J = 3.7\text{ Hz}$ , 1H), 5.20 (d,  $J = 3.1\text{ Hz}$ , 1H), 5.00 (d,  $J = 10.7\text{ Hz}$ , 1H), 4.98 (d,  $J = 10.7\text{ Hz}$ , 1H), 4.90–4.84 (m, 3H), 4.81 (d,  $J = 10.7\text{ Hz}$ , 1H), 4.73 (d,  $J = 11.9\text{ Hz}$ , 1H), 4.70–4.66 (m, 3H), 4.55 (d,  $J = 10.1\text{ Hz}$ , 1H), 4.53 (d,  $J = 12.2\text{ Hz}$ , 1H), 4.47 (d,  $J = 10.7\text{ Hz}$ , 1H), 4.38 (d,  $J = 12.2\text{ Hz}$ , 1H), 4.25 (ddd,  $J = 10.1$ ,

2.8, 2.1 Hz, 1H), 4.21 (dd,  $J = 12.2, 2.1$  Hz, 1H), 4.17–4.11 (m, 2H), 4.06 (dd,  $J = 9.2, 9.2$  Hz, 1H), 4.01 (dd,  $J = 9.5, 9.2$  Hz, 1H), 3.67 (dd,  $J = 10.1, 9.2$  Hz, 1H), 3.65–3.61 (m, 1H), 3.60 (dd,  $J = 9.5, 3.7$  Hz, 1H), 3.56–3.51 (m, 2H), 3.50 (dd,  $J = 10.7, 3.4$  Hz, 1H), 3.36 (dd,  $J = 10.7, 1.8$  Hz, 1H), 2.50–2.30 (m, 2H), 1.69–1.51 (m, 4H), 1.47–1.16 (m, 50H), 0.91–0.87 (m, 6H);  $^{13}\text{C}$  NMR (126 MHz,  $\text{CDCl}_3$ ):  $\delta$  175.4, 139.0, 138.8, 138.5, 138.2, 138.1 (2C), 138.0, 128.60 (2C), 128.58 (2C), 128.54 (2C), 128.51–128.44 (8C), 128.13–128.05 (8C), 128.03, 128.00 (2C), 127.9, 127.81 (2C), 127.76, 127.66 (2C), 127.6 (2C), 127.4 (2C), 94.5, 94.1, 81.9, 81.7, 79.8, 79.5, 78.0, 77.8, 75.8, 75.7, 75.4, 75.2, 73.6, 73.1, 72.9, 72.3, 70.9, 69.1, 68.3, 62.5, 51.4, 35.6, 32.1 (2C), 29.90–29.74 (16C), 29.6 (2C), 29.5 (2C), 27.7, 25.9, 22.8 (2C), 14.3 (2C); HRMS-ESI ( $m/z$ ):  $[\text{M}+\text{Na}]^+$  calcd for  $\text{C}_{93}\text{H}_{126}\text{NaO}_{13}$ , 1473.9096; found 1473.9079

Compound **S13**:  $[\alpha]_{\text{D}}^{18} +61.05$  ( $c$  0.22,  $\text{CHCl}_3$ );  $^1\text{H}$  NMR (500 MHz,  $\text{CDCl}_3$ ):  $\delta$  7.36–7.20 (m, 33H), 7.14–7.10 (m, 2H), 5.20 (d,  $J = 3.7$  Hz, 1H), 5.19 (d,  $J = 3.7$  Hz, 1H), 4.99 (d,  $J = 11.0$  Hz, 1H), 4.98 (d,  $J = 10.7$  Hz, 1H), 4.89–4.84 (m, 3H), 4.80 (d,  $J = 10.7$  Hz, 1H), 4.72 (d,  $J = 11.9$  Hz, 1H), 4.71–4.65 (m, 3H), 4.55 (d,  $J = 10.7$  Hz, 1H), 4.53 (d,  $J = 11.9$  Hz, 1H), 4.46 (d,  $J = 10.7$  Hz, 1H), 4.37 (d,  $J = 12.2$  Hz, 1H), 4.24 (ddd,  $J = 10.1, 2.4, 2.1$  Hz, 1H), 4.20 (dd,  $J = 12.2, 2.1$  Hz, 1H), 4.16–4.11 (m, 2H), 4.04 (dd,  $J = 9.2, 9.2$  Hz, 1H), 4.01 (dd,  $J = 9.5, 9.2$  Hz, 1H), 3.67 (dd,  $J = 9.8, 9.2$  Hz, 1H), 3.66–3.61 (m, 1H), 3.60 (dd,  $J = 9.5, 3.7$  Hz, 1H), 3.58–3.51 (m, 2H), 3.48 (dd,  $J = 11.0, 3.4$  Hz, 1H), 3.34 (dd,  $J = 11.0, 1.8$  Hz, 1H), 2.44–2.38 (m, 2H), 1.69–1.51 (m, 4H), 1.48–1.17 (m, 50H), 0.91–0.85 (m, 6H);  $^{13}\text{C}$  NMR (126 MHz,  $\text{CDCl}_3$ ):  $\delta$  175.2, 139.0, 138.8, 138.5,

138.2, 138.1 (2C), 138.0, 128.64–128.44 (14C), 128.15–128.04 (9C), 128.01 (2C), 127.9, 127.82 (2C), 127.77, 127.7 (2C), 127.6 (2C), 127.4 (2C), 94.6, 94.2, 81.9, 81.7, 79.9, 79.5, 77.9, 77.8, 75.9, 75.7, 75.4, 75.2, 73.7, 73.2, 73.0, 72.3, 70.9, 69.2, 68.3, 62.3, 51.7, 35.7, 32.1 (2C), 29.90–29.73 (16C), 29.67, 29.65, 29.5 (2C), 27.5, 25.9, 22.9 (2C), 14.3 (2C); **HRMS-ESI (*m/z*):**  $[M+Na]^+$  calcd for  $C_{93}H_{126}NaO_{13}$ , 1473.9096; found 1473.9102

### TMM (C32, *RR*)

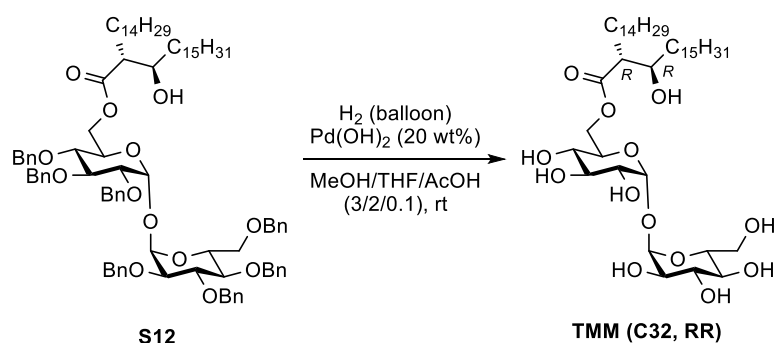

To a solution of **S12** (153 mg, 106  $\mu\text{mol}$ ) in methanol (3.0 mL), THF (2.0 mL), and AcOH (0.10 mL) was added  $\text{Pd(OH)}_2/\text{C}$  (30 mg, 20 wt%) under argon atmosphere. The flask was equipped with a hydrogen balloon via a three-way cock and purged with hydrogen. After stirring for 24 h at room temperature, the mixture was filtered through a pad of Celite<sup>®</sup>, and the filtrate was concentrated. The residue was purified by silica gel column chromatography (Iatrobeads 6RS-8060<sup>®</sup>,  $\text{CHCl}_3/\text{MeOH}$  10/1 to 2/1) to give **TMM (C32, *RR*)** (79.8 mg, 97.2  $\mu\text{mol}$ , 92%) as a pale yellow solid.

The  $^1\text{H-NMR}$  spectrum of the product obtained here exhibited somewhat different chemical shifts compared to previously reported data(7), likely due to variations in



solvent composition and compound concentration. However, the  $^{13}\text{C}$ -NMR spectrum showed a general agreement. Consequently, it can be concluded that the product is **TMM (C32, *RR*)**.

## References

1. S. R. Gilbertson, C.-W. T. Chang, Synthesis of New Disugar Phosphine Ligands and Their Use in Asymmetric Hydrogenation. *The Journal of Organic Chemistry* **60**, 6226-6228 (2002).
2. A. A. Khan *et al.*, Long-chain lipids are required for the innate immune recognition of trehalose diesters by macrophages. *Chembiochem* **12**, 2572-2576 (2011).
3. Y.-Q. Zheng *et al.*, Influence of solution-state aggregation on conjugated polymer crystallization in thin films and microwire crystals. *Giant* **7**, (2021).
4. V. A. Sarpe, S. S. Kulkarni, Synthesis of maradolipid. *J Org Chem* **76**, 6866-6870 (2011).
5. A. K. Datta, K. Takayama, M. A. Nashed, L. Anderson, An improved synthesis of trehalose 6-mono- and 6,6'-di-corynomycolates and related esters. *Carbohydr Res* **218**, 95-109 (1991).
6. K. M. Backus *et al.*, Uptake of unnatural trehalose analogs as a reporter for Mycobacterium tuberculosis. *Nat Chem Biol* **7**, 228-235 (2011).
7. T. Ikazaki *et al.*, Ligand-Controlled Stereoselective Synthesis and Biological Activity of 2-Exomethylene Pseudo-glycoconjugates: Discovery of Mincle-Selective Ligands. *Angew Chem Int Ed Engl* **62**, e202302569 (2023).
